# 1 Saccade countermanding reflects automatic inhibition as well as top-down cognitive control

2

3 Aline Bompas\*, Anne Eileen Campbell and Petroc Sumner

4

5 CUBRIC – School of Psychology, Cardiff University, Wales, UK

6 Tower building, 70 Park Place, CF10 3AT Cardiff, Wales, United Kingdom

7 [\\*BompasAE@Cardiff.ac.uk](mailto:*BompasAE@Cardiff.ac.uk)

8

## 9 Abstract

10 Countermanding behavior has long been seen as a cornerstone of executive control – the  
11 human ability to selectively inhibit undesirable responses and change plans. In recent years,  
12 however, scattered evidence has emerged that stopping behavior is entangled with simpler  
13 automatic stimulus-response mechanisms. Here we give flesh to this idea by merging the latest  
14 conceptualization of saccadic countermanding with a versatile neural network model of visuo-  
15 oculomotor behavior that integrates bottom-up and top-down drives. This model accounts for  
16 all fundamental qualitative and quantitative features of saccadic countermanding, including  
17 neuronal activity. Importantly, it does so by using the same architecture and parameters as  
18 basic visually guided behavior and automatic stimulus-driven interference. Using simulations  
19 and new data, we compare the temporal dynamics of saccade countermanding with that of  
20 saccadic inhibition (SI), a hallmark effect thought to reflect automatic competition within  
21 saccade planning areas. We demonstrate how SI accounts for a large proportion of the saccade  
22 countermanding process when using visual signals. We conclude that top-down inhibition acts  
23 later, piggy-backing on the quicker automatic inhibition. This conceptualization fully accounts  
24 for the known effects of signal features and response modalities traditionally used across the  
25 countermanding literature. Moreover, it casts different light on the concept of top-down  
26 inhibition, its timing and neural underpinning, as well as the interpretation of stop-signal  
27 reaction time, the main behavioral measure in the countermanding literature.

28

29

## 30 1. Introduction

31

32 There is a long tradition in psychology and neuroscience of drawing a conceptual distinction  
33 between ‘top-down’ volitional processes and ‘bottom-up’ automatic responses. However, this  
34 does not mean there is a clear distinction in the brain. Nor is it likely that any behavior  
35 produced by any elaborate animal is entirely bottom-up or top-down in nature. Rather, we  
36 envisage an enmeshed relationship whereby increasingly selective or “voluntary” systems have  
37 grown out of, and remain entwined with, phylogenetically older automatic mechanisms (see  
38 Harrison, Freeman, & Sumner, 2014; McBride, Boy, Husain, & Sumner, 2012; Sumner & Husain,  
39 2008; Verbruggen, Best, Bowditch, Stevens, & McLaren, 2014; Verbruggen & Logan, 2008;  
40 Wessel & Aron, 2017).

1 Here we address a long-standing topic in top-down control: the ability to *withhold* action.  
2 Just as music is about the spaces as well as the notes, behavior is about the actions we don't  
3 make as well as the actions we do make (Noorani & Carpenter, 2017). Clearly, humans are able  
4 to control their motor systems and refrain from always acting reflexively, habitually or  
5 impulsively. We have the flexibility to halt and change action plans in rapidly changing  
6 situations, such as sport, social interactions, or driving a car. The precise mechanisms that  
7 might enable us to do this have been a major focus of psychology and cognitive neuroscience.  
8 Over the years, work on human (Verbruggen, Best, et al., 2014; Verbruggen, McLaren, &  
9 Chambers, 2014; Wessel & Aron, 2017), primates (Logan, Yamaguchi, Schall, & Palmeri, 2015;  
10 Schall, Palmeri, & Logan, 2017) and rodent (Schmidt & Berke, 2017) has shown that, rather  
11 than reflecting solely a higher-level ability, stopping behavior also relies on a range of  
12 complementary lower-level adjustments. In convergence with this, here we propose that the  
13 ability to withhold action partly relies on fast drives triggered by any change in the  
14 environment. These automatic signals interfere with ongoing action plans, temporarily  
15 delaying their execution, buying time for slower and more selective drives to cancel or change  
16 the plan.

17 Animal brains are full of inhibitory connections (see Noorani & Carpenter, 2017 for a  
18 review), many of which can be considered very basic and automatic properties of neural maps  
19 or local networks. What contribution could these low-level mechanisms play in behaviors  
20 traditionally ascribed to top-down control? Could they even form the main basis for well-  
21 known hallmarks of 'control' behavior in some conditions? Even though they may be rather  
22 indiscriminate and simple, the potential advantage of low-level stimulus-driven inhibitory  
23 circuits would be their speed - a quick interruption allowing slower more complex processes  
24 time to update action plans (e.g. Schmidt & Berke, 2017). If we can understand how automatic,  
25 rapid and indiscriminate mechanisms work within tasks associated with top-down control, it  
26 should help us unify literatures on control and distraction (e.g. Wessel & Aron, 2017) and also  
27 better integrate the functional consequences of basic sensorimotor processes with concepts of  
28 higher cognitive functions.

29 Important tools to develop and test our understanding of these mechanisms are  
30 computational models. In the recent years, their number and complexity have increased, with  
31 models becoming more biologically grounded, attempting to capture not only behavioral data,  
32 but also neuronal recordings (Bompas, Hedge, & Sumner, 2017; Bompas & Sumner, 2011;  
33 Boucher, Palmeri, Logan, & Schall, 2007; Cutsuridis, Smyrnis, Evdokmids, & Perantonis, 2007;  
34 Kopecz, 1995; Lo, Boucher, Pare, Schall, & Wang, 2009; Logan et al., 2015; Meeter, Van der  
35 Stigchel, & Theeuwes, 2010; Purcell et al., 2010; Shadlen, Britten, Newsome, & Movshon,  
36 1996; Trappenberg, Dorris, Munoz, & Klein, 2001; Wiecki & Frank, 2013). However, the focus  
37 on different tasks, animal models and anatomical subsystems has led to partly segregated  
38 subfields in the literature, and sometimes to the parallel development of distinct models  
39 attempting to capture different instantiations of similar cognitive functions. As a result, most  
40 current psychological models have been designed and constrained to capture mainly one task,  
41 and the generalizability to new tasks is not often tested. Although this limitation is inevitable  
42 in the early days of biologically inspired computational models of action decision, a desirable  
43 perspective for the field would be to move away from modeling tasks and start modeling the  
44 biological system trying to perform it. To achieve this, a first step is to draw modeling attempts  
45 together and develop more general models, ultimately able to predict human or animal  
46 behavior in new experimental conditions.

47

1 **Stopping**

2 A prevalent paradigm of top-down inhibition used widely within the psychological, psychiatric  
3 and neurophysiological literatures is ‘countermanding’, epitomized by the stop signal task  
4 (Logan & Cowan, 1984; Noorani & Carpenter, 2017). Participants make simple responses to the  
5 presentation of a target and, on a minority of trials, are required to cancel (‘countermand’) their  
6 response following the onset of a stop-signal (**Figure 1A**). Hence, this task is designed to  
7 assess the volitional ability to rapidly inhibit responses that are already being planned.

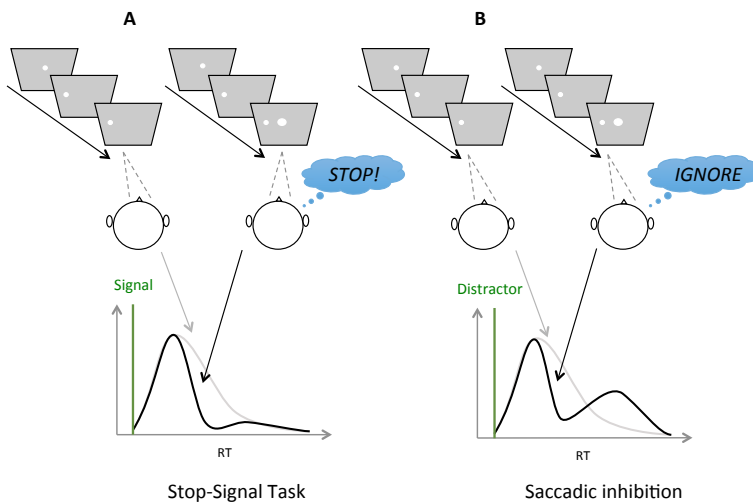

9 **Figure 1.** Typical design (above) and results (below) in the saccadic Stop-Signal Task (SST, panel  
10 A) and Saccadic Inhibition (SI, panel B) paradigms. Both paradigms involve a stimulus jump  
11 from center to periphery, sometimes followed by the onset of a central signal (right subpanels  
12 above, black lines below), sometimes not (left subpanels, grey lines). The signal onset time is  
13 indicated by vertical green lines and the delay between the target jump and the signal is  
14 referred to as the stimulus onset asynchrony (SOA). The two tasks differ in the instruction  
15 associated with the signal onset, withhold the saccade in the SST, ignore the signal and  
16 perform the saccade in the SI. **A.** Instructions to stop remove slower responses from the RT  
17 distribution, but fast responses escape (‘failed stops’). **B.** The same visual events associated  
18 with an ignore instruction typically produce a dip in the latency distribution, where saccades  
19 are delayed and subsequently recover, so that the total number of saccades are about the  
20 same between signal present and no-signal distributions. We propose that on trials where  
21 participants are told to stop their saccade in response to the signal onset (A), the initial  
22 reduction in saccade probability has the same automatic source and therefore will happen at  
23 the same time as the dip in the ignore condition (B), but the recovery from the dip will be  
24 diminished or absent due to later top-down inhibition.

26 The process of such top-down inhibition has long been conceptualized as a race between  
27 competing “go” and “stop” mechanisms within the independent horse-race model (Logan &  
28 Cowan, 1984). If the countermand activity can overtake the go activity, then the response is  
29 not executed; whereas if the go activity reaches its threshold before the stop-response activity  
30 overtakes it, then the response is executed (known as a failed stop). Failed stops tend to have  
31 short latencies with respect to the stop signal, consistent with the idea that top-down  
32 inhibition did not have sufficient time to act.

1 Since then, countermanding tasks have used a variety of response modalities and stimulus  
2 designs, but the basic principles of design and of behavioral outcomes are shared. The saccade  
3 (eye movement) countermanding task (Hanes & Schall, 1995) became the dominant modality  
4 for primate experiments, and has allowed the bridging of psychology and neurophysiology.  
5 The conceptual race between go and stop processes was then mapped onto more complex  
6 models capturing the neural architecture of the saccadic control network (Boucher, Palmeri, et  
7 al., 2007; Schall et al., 2017), implementing an antagonistic relationship between fixation and  
8 movement processes (Hanes, Patterson, & Schall, 1998; Munoz & Wurtz, 1993a, 1993b).

9 The latest instantiation of this converging conceptualization is the Blocked Input 2.0  
10 model (Logan et al., 2015). In this model (**Figure 2B**), the onset of the “stop signal” is proposed  
11 to trigger two events: a quick return of excitatory input to fixation node, followed by a blocking  
12 of the excitatory input to the movement node. Although this model provides a similar fit to  
13 behavioral data as the simpler independent race model (or equally complex alternative  
14 models, see Logan et al., 2015), it better reflects the pattern of activity recorded in fixation and  
15 movement neurons within the frontal eye field of monkeys performing the stop-signal task.  
16 Being closer to the neuronal implementation of saccade planning opens the door to an  
17 increased ability to generalize to new tasks in ways that can be tested by both behavior and  
18 neurophysiology.

19 Before Blocked Input 2.0, the stop or fixation activity was typically thought to be a  
20 unitary, purely top-down drive. In contrast, in Blocked Input 2.0, the very short latency of the  
21 first event (less than 50 ms) suggests it could be essentially bottom up in nature, while the  
22 later event (62-90 ms) is explicitly described as the top-down inhibitory control element. This  
23 suggests a potential evolution in the conceptual understanding of withholding action from a  
24 purely “top-down” inhibition account to a combination of “bottom-up” and “top-down”  
25 factors. This broad idea has been proposed before. For instance, Cabel et al. (2000) and then  
26 Morein-Zamir and Kingstone (2006) discussed the possibility that saccade countermanding  
27 using a central visual stop-signal captures a combination of automatic bottom-up as well as  
28 top-down volitional inhibition of responses, possibly due to stimulus-invoked activity of  
29 fixation cells of the superior colliculus. There are several empirical findings strongly suggesting  
30 that countermanding is not a pure measure of top down control, but rather induces an  
31 interaction between top-down and low level mechanisms. Alterations to the stimuli used, in  
32 particular in the saccadic version, can strongly affect the main outcome measure - the stop  
33 signal reaction time (SSRT), assumed to be the latency required to inhibit an already initiated  
34 go-response. For example a central visual signal provides a shorter SSRT than an auditory  
35 signal or a peripheral visual signal (Armstrong & Munoz, 2003; Asrress & Carpenter, 2001;  
36 Boucher, Stuphorn, Logan, Schall, & Palmeri, 2007; Cabel, Armstrong, Reingold, & Munoz,  
37 2000; Hanes & Carpenter, 1999; Hanes et al., 1998; Hanes & Schall, 1995; Ito, Stuphorn,  
38 Brown, & Schall, 2003; Morein-Zamir & Kingstone, 2006; Paré & Hanes, 2003; Stuphorn,  
39 Taylor, & Schall, 2000). In addition, introducing a 200 ms gap between fixation offset and  
40 target onset can reduce both reaction time and SSRT (Stevenson, Elsley, & Corneil, 2009).

41 This conceptual evolution is also occurring in related fields. For instance, Schmidt and  
42 Berke (2017) echo the idea of fast and slow inhibition processes in their ‘Pause-then-Cancel’  
43 theory of basal ganglia mechanisms in rodents. Wessel and Aron (2017) propose that rapid  
44 stopping in humans entails the same fronto-basal-ganglia network that disrupts motor plans  
45 following unexpected events, potentially unifying literatures on countermanding with post-  
46 error slowing and attentional distraction in humans. In the domain of motor priming, Sumner  
47 and Hussain (2008) argued that automatic priming was one of the building blocks for conscious  
48 voluntary planning and control, while others merged the concepts of reflex and volition in the

1 concept of conditional automaticity (see Kunde, Kiesel, & Hoffmann, 2003 for a discussion). In  
2 the oculomotor domain, Harrison et al. (2014) proposed that voluntary saccade control shares  
3 mechanisms with, and probably emerged in evolution from the quick phases of stimulus-  
4 driven nystagmus. Conceptually, it is clear that several fields are moving away from the idea of  
5 an “executive controller”, and working toward characterizing the “army of idiots” that allow  
6 successful action control (Monsell & Driver, 2000; Verbruggen, McLaren, et al., 2014).

### 7 8 ***Pausing and carrying on***

9 In order to draw together and build on these discussions, here we explore the extent to which  
10 countermanding can be accounted for by a low level, automatic disruption mechanism. In  
11 oculomotor behavior, new stimuli produce a hallmark phenomenon known as saccadic  
12 inhibition (SI, Buonocore & McIntosh, 2008, 2012; Buonocore, Purokayastha, & McIntosh,  
13 2017; Edelman & Xu, 2009; McIntosh & Buonocore, 2014; Reingold & Stampe, 2002, 2004). SI  
14 occurs under most scenarios in which a flash or new stimulus occurs while the system is  
15 planning a saccade, for example when reading text, viewing a scene or in simple saccade  
16 experiments. When these irrelevant stimuli occur during saccade planning, a population of  
17 would-be saccades is temporarily withheld, creating a dip in the latency distribution time-  
18 locked to the onset of this distractor (**Figure 1B**). This inhibition is thought to be a purely  
19 automatic process where the distractor elicits competing activation in saccade planning areas  
20 (such as the Superior Colliculus) that limits the rise-to-threshold activity for the planned  
21 saccades to the target (Bompas & Sumner, 2011; Edelman & Xu, 2009; Reingold & Stampe,  
22 2002).

23 These temporarily withheld saccades can be accounted for by a relatively simple  
24 biologically-inspired model (**Figure 2C**) based upon exogenous and endogenous neural signals  
25 and lateral inhibition in the intermediate layers of the SC (Bompas & Sumner, 2011, 2015;  
26 Trappenberg et al., 2001). The latency distributions produced both by the model and by  
27 human participants show a characteristic pattern with three phases following the distractor  
28 stimulus (**Figures 1B and 3C**): for the first 70-100 ms saccades entirely escape influence and  
29 are executed as usual (the distribution of saccades with or without distractors exactly overlap);  
30 then there is a dip - a reduction in the number of saccades produced compared with baseline  
31 conditions (with no distractor); lastly there is a recovery phase where the disrupted saccades  
32 are produced later in the distribution.

33 Critically, this model was not originally developed to capture saccadic inhibition, but it  
34 readily did so when tested against the relevant experimental conditions (Bompas & Sumner,  
35 2011). It was designed to account for other typical aspects of oculomotor control, including  
36 express saccades, anti-saccades, variation of target probability and the gap effect  
37 (Trappenberg et al., 2001). Although its versatility comes at the cost of mathematical elegance  
38 (compared to simpler models designed to fit RT distributions, Brown & Heathcote, 2005;  
39 Carpenter & Williams, 1995; Ratcliff & McKoon, 2008), a conservative and principled approach  
40 to parameter constraining can be applied to test new empirical predictions. Although originally  
41 based on superior colliculus, the model architecture is also more general because similar  
42 behavioral phenomena and model principles extend to manual responses (Bompas et al.,  
43 2017).

## 1 ***Merging paradigms and models***

2 Volitional countermanding and automatic saccadic inhibition have so far been discussed in  
3 separate literatures and have different computational models associated with them. However,  
4 the latency distributions typical of both phenomena show a similar pattern: failed stops  
5 executed shortly after the signal escape inhibition and then at some delay following the signal  
6 there is a rapid reduction of response probability. Although this reduction has been  
7 traditionally attributed to the influence of top-down inhibition, our hypothesis is that it reflects  
8 the same automatic dip caused by the low-level indiscriminate saccadic inhibition mechanism.  
9 More selective control could then evolve later to inhibit the recovery phase, piggy-backing on  
10 the process begun by the automatic mechanism.

11 This kind of hypothesis has been proposed before, but never formally tested (Akerfelt,  
12 Colonius, & Diederich, 2006). It shares conceptual similarity with the Pause-then-Cancel theory  
13 (Schmidt & Berke, 2017) derived from studying basal ganglia in rats (although the specific  
14 concepts and implementations are different as explained further in Discussion). We also  
15 consider it belongs in a growing family of proposals, briefly mentioned above, that attempt to  
16 integrate processes that were traditionally categorized as either volitional or reflexive. For  
17 example, although Wessel and Aron's theory of unexpected events extends to the cognitive  
18 level, while ours is a mechanistic model of oculomotor planning, both carry the implication  
19 that countermanding is built on top of – and during evolution has grown out of – an  
20 indiscriminate response to novel visual stimuli (see discussion in Harrison et al., 2014 for  
21 similar ideas on the evolution of voluntary saccade control from automatic nystagmus).

22 The computational models of countermanding and saccadic inhibition, while currently  
23 separate, are both biologically grounded and inspired by neuronal recordings. In fact, they  
24 share many properties. It therefore appears desirable to use both paradigms to constrain a  
25 merged model, able to capture both tasks. To achieve this (**Section 2**), we first employ the  
26 latest models applied respectively to the stop task (Blocked Input 2.0) and saccadic inhibition  
27 (200N-DINASAUR, 200-Nodes Dual Input Neural Accumulator with Sustained and AUtomatic  
28 Rise) and test the direct generalizability of each model to the conditions to which it had not  
29 been previously applied. We observe that DINASAUR can readily generalize across contexts  
30 when its endogenous response to the stop signal is a switch from target to fixation, as  
31 proposed by the Blocked Input model.

32 Based on previous empirical data and our modeling, we make two key predictions, which  
33 we then test empirically. First, the early interference effects should be (almost) the same  
34 whether the instruction is to stop or ignore the signal. More specifically, the time at which the  
35 two distributions (in the presence and absence of signal) depart should be aligned across tasks.  
36 To confirm this, we designed two experiments, both combining saccade countermanding and  
37 saccadic inhibition paradigms using the same stimuli and participants but varying the  
38 instruction (**Sections 3 and 4**).

39 The second prediction is that stopping behavior should be predicted by the model from  
40 the parameters obtained from basic oculomotor behavior. We do not fit the model to the  
41 stopping behavior itself. Rather, we extract the parameters from the conditions with simple  
42 saccades and saccadic inhibition (or inherit them from previous work), and we test whether  
43 the behavioral responses in the stopping condition naturally follows (**Section 5**). It is worth  
44 emphasizing this point, because the model does have multiple parameters. Crucially we do not  
45 allow them to vary when transferring across tasks. This is a stern test, as it is rare that a model  
46 can capture a new task without allowing multiple parameters to vary in a fresh fitting.

## 1 2. Model exposition and predictions

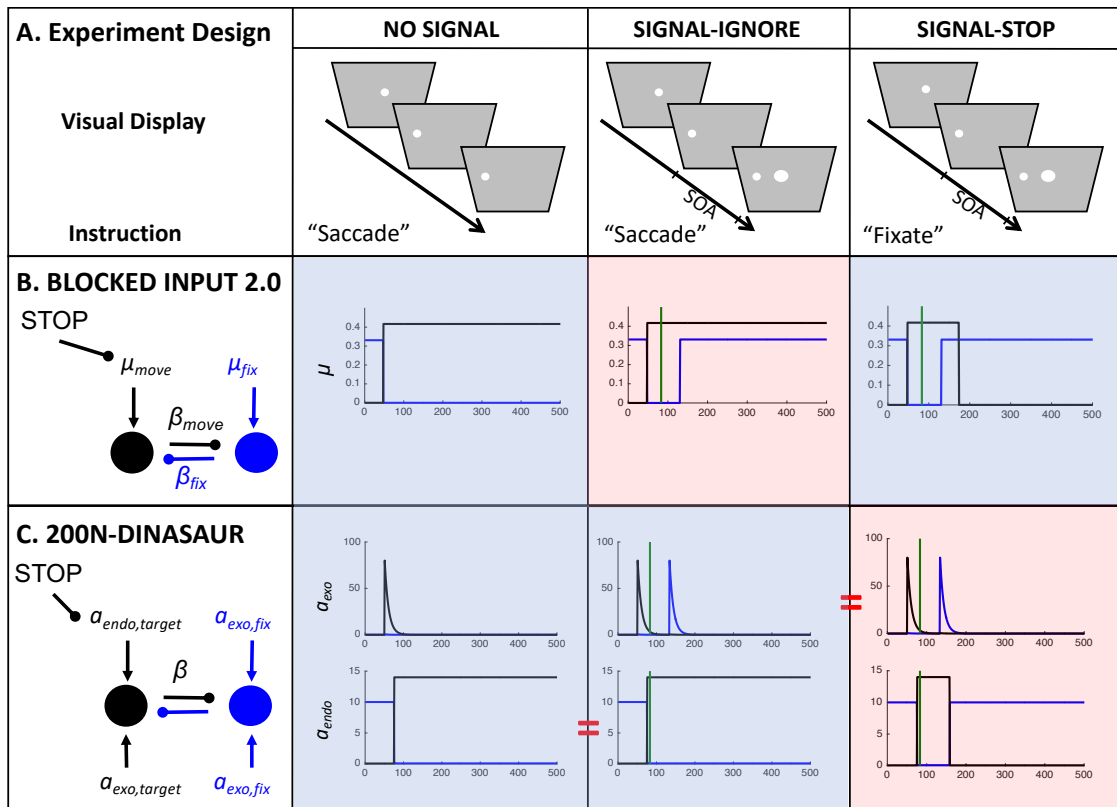

2

3 **Figure 2.** Inputs to Blocked Input 2.0 and 200N-Dinosaur for each task condition, based on  
4 published versions (blue shaded areas; Logan et al., 2015; Bompas & Sumner, 2011) or  
5 parsimonious generalizations to new conditions (red shaded areas, using SOA = 83 ms as in the  
6 new experiments introduced below). **A.** Schematic task conditions (see Figure 1 for description).  
7 **B.** Blocked Input 2.0 was originally designed for the stop task encompassing the NO-SIGNAL  
8 and SIGNAL-STOP conditions (blue shade). In the most parsimonious generalization to the  
9 IGNORE instructions (red shade), the late "blocking" of move input does not occur (black line),  
10 just as in NO-SIGNAL conditions, while the stimulus onset reactivates fixation input (blue line)  
11 just as in the SIGNAL-STOP condition. **C.** 200N-DINASAUR was shown to capture saccadic  
12 inhibition (NO-SIGNAL = pro-saccade, SIGNAL-IGNORE = distractor condition, blue shade). Out  
13 of the 200 nodes, here only the fixation and target nodes are shown. The model categorizes  
14 inputs as exogenous (stimulus-elicited and transient, upper plots) or endogenous (instruction-  
15 related and sustained, lower plots). A straightforward generalization to the STOP instruction  
16 (red shade) is to assume the exogenous inputs are unchanged, while the endogenous input  
17 switches from the target back to fixation, like in Blocked Input 2.0. Note that in Blocked Input  
18 2.0, this switch is not simultaneous: fixation drive reappears before move drive is blocked to  
19 allow for the extra rapidity of a stimulus-driven response. In DINASAUR, the exogenous input  
20 already accounts for the rapid stimulus-elicited activity, so parsimoniously the endogenous  
21 switch can be simultaneous: the onset of endogenous fixation drive is given the same delay as  
22 the offset of endogenous saccade drive.

23

## 1 **2.1. Blocked Input 2.0**

2 This model was developed to capture the stop signal task and is described in Logan et al.  
3 (2015). Among multiple alternatives, it was the model best able to capture both the behavior  
4 of monkeys and the neural activity recorded in their FEF. It is a leaky accumulator with 2  
5 nodes, representing the fixation and movement options, which are mutually inhibitory (**Figure**  
6 **2B**). The go-signal is associated with a switch of input from the fix to the move node, occurring  
7 shortly after target onset ( $D_{move}$  and  $D_{fix}$  both less than 50 ms, here grouped as a single  
8 parameter  $D$  as they turned out to be numerically almost identical). The stop signal triggers  
9 two additional events: the fixation node quickly receives excitatory input again (following  
10 about the same delay  $D$ ), then the input to the move node is switched off ('blocked') by a stop  
11 module (some  $D_{Control}$  delay after the signal; see Figure 2B right-hand blue panel). Node activity  
12  $a$  directly maps onto firing rate, and evolves over time according to the following equation:

$$13 \quad \tau \frac{da_i}{dt} = -k_i \cdot a_i(t) + \mu_i - \beta_j \cdot a_j(t) + N(0, \sigma)$$

14 with  $i$  being either fixation or move node and  $j$  being the other node,  $k$  representing leakage,  $\mu$   
15 the intensity of inputs projecting from other areas,  $\beta$  the weight of inhibition from the other  
16 node and  $\sigma$  the amplitude of normally distributed noise added independently to each time  
17 step.

18 The most straightforward generalization of the model to IGNORE instructions (which have  
19 not featured in monkey stop task experiments), is inspired by the logic developed from  
20 DINASAUR, whereby exogenous inputs should be the same irrespective of the instruction, and  
21 only endogenous signals would be allowed to change. Here we associated the quick return of  
22 fixation signals as exogenous and the slower inhibition of target input as endogenous in this  
23 model. Thus, the presence of the signal requires fixation input to return identically as in the  
24 STOP condition, while the absence of the instruction to stop requires that move input is not  
25 blocked (Figure 2B red shaded panel).

26

## 27 **2.2. 200N-DINASAUR**

28 This model was initially developed by Trappenberg et al. (2001) to extract and simplify key  
29 features of the SC based on both known neurophysiology and established principles of leaky  
30 interactive accumulators (Usher & McClelland, 2001). Subsequently, Bompas and Sumner  
31 (2011, 2015; Bompas et al. 2017) showed that it predicted the characteristic dips of saccadic  
32 inhibition (the model is conceptually similar to the explanation given for saccadic inhibition by  
33 Reingold & Stampe, 2002), and in return these dips directly specify the delay time for  
34 exogenous input.

35 200N-DINASAUR shares many features with Blocked Input as both are noisy leaky  
36 competing accumulators. DINASAUR has 200 nodes representing the horizontal dimension of  
37 the visual field, and the average spiking rate  $A_i$  of neuron  $i$  is a logistic function of its internal  
38 state  $u_i$ :

$$39 \quad A_i(t) = 1/(1 + e^{-\beta u_i(t)})$$

40 while  $u_i$  varies across time  $t$  depending on normally distributed noise as well as the input  
41 received, either external to the map (endogenous or exogenous) or internal via lateral  
42 connections:



$$1 \quad \tau \frac{du_i}{dt} = -ku_i(t) + \frac{1}{n} \sum_j \omega_{ij} A_j(t) + I_i^{exo}(t) + I_i^{endo}(t) + N(0, \eta)$$

2 A key aspect of DINASAUR is that it explicitly dissociates exogenous inputs (transients tied to  
 3 visual events) from endogenous signals (later, sustained and linked to the instructions). Of  
 4 course, this is still a gross simplification of the many sensory pathways (exogenous) and other  
 5 pathways (endogenous) that feed oculomotor planning. Endogenous inputs vary as step  
 6 functions (similar to inputs in the Blocked Input models), while exogenous inputs are transient,  
 7 reaching their maximal amplitude ( $a_{exo}$ ) at  $t = t_{onset} + \delta_{vis}$ , and then decreasing exponentially as  
 8 a function of time, according to the following equation:

$$9 \quad \tau_{on} \frac{dI_i^{exo}}{dt} = -I_i^{exo}(t) + a_{exo}$$

10 Exogenous inputs are tied to visual stimuli (e.g. targets, distractors or stop signals) and our key  
 11 assumption is that these happen irrespective of the instructions. By default, we also assume  
 12 that their properties (delay and strength) are not influenced by instruction, but see Discussion  
 13 for expansion of this simplification). Exogenous inputs allow the model to produce express  
 14 saccades (early mode at 70-110 ms on Figure 3B,D). All inputs have Gaussian spatial profiles  
 15 (with SD  $\sigma$ ): are maximal at the targeted nodes but also affect nearby nodes. Lateral  
 16 connections show a Gaussian spatial profile that changes from positive (excitation) at short  
 17 distance to negative (inhibition) at longer distance, described by the following equation:

$$18 \quad \omega_{ij} = (Act + Inh) * \exp\left(-\frac{D_{ij}^2}{2\sigma^2}\right) - Inh$$

19 In 200-DINASAUR, the NO-SIGNAL condition is characterized by a single exogenous  
 20 (visual) transient from target onset (occurring  $\delta_{vis}$  after target onset), shortly followed by a  
 21 switch of endogenous support from fixation to target ( $\delta_{endo}$  after target onset). The SIGNAL-  
 22 IGNORE condition differs from the NO-SIGNAL condition solely by the presence of a second  
 23 visual transient, triggered by the signal appearing (the instruction being the same, no  
 24 alteration of the endogenous inputs is assumed).

25 To generalize the model to SIGNAL-STOP conditions, we assume that only the endogenous  
 26 input should differ from the SIGNAL-IGNORE condition, since the visual display is identical and  
 27 only the instructions differ. Following the logic of Blocked Input 2.0, the endogenous input to  
 28 the target is switched off (blocked)  $\delta_{endo}$  after the stop-signal, while the endogenous input to  
 29 the fixation is switched on again. Unlike Blocked Input, however, the timings of these two  
 30 events do not need to be free. Rather, there is a single  $\delta_{vis}$  parameter inherited from the  
 31 SIGNAL-IGNORE condition, and a single  $\delta_{endo}$  parameter for both target and fixation nodes  
 32 (with the delay between  $\delta_{vis}$  and  $\delta_{endo}$  inherited from previous work). Importantly, there is no  
 33 need for this fixation drive to come back early, since the early stimulus-driven effect of any  
 34 stimulus is already captured by the exogenous signal.

35

### 36 **2.3. Generalization to new paradigms from Blocked Input 2.0 and 200N-DINASAUR**

37 To test the generalization from both models to new tasks, we inherit as many parameter  
 38 values as possible from previous publications, and make changes only where dictated by  
 39 stimulus arrangement or the logic outlined above. For Blocked Input 2.0, parameter values are  
 40 given in **Table 1** and come from Monkey C in Logan et al. (2015) as its results were always

1 shown first in their article. Using parameters from Monkey A did not alter our conclusion in  
 2 any respect. For DINASAUR, parameter values are given in **Table 2**, and come from Bompas  
 3 and Sumner (2011). As expected, both models capture well the paradigm to which they have  
 4 been applied previously (blue shaded panels on **Figure 3**).

5 **Table 1.** Model parameters for Blocked Input 2.0, as used in **Figures 2 and 3**. Grey boxes  
 6 indicate parameters that were inherited from Monkey C in Logan et al. (2015), and correspond  
 7 to the STOP instruction. The only alteration is that, in the IGNORE condition,  $\mu_{move}$  remains up  
 8 whether a signal appears or not (white box) but no new parameter is introduced.

| Name              | Description                                           | STOP  | IGNORE       |
|-------------------|-------------------------------------------------------|-------|--------------|
| $\tau$            | Decay time constant (ms)                              | 1     |              |
| $\beta_{move}$    | Inhibition from move node                             | 0.004 |              |
| $\beta_{fix}$     | Inhibition from fix node                              | 0.01  |              |
| $k$               | Leakage                                               | 0.008 |              |
| $\sigma$          | Noise amplitude                                       | 1     |              |
| $\delta_{out}$    | Output time (ms)                                      | 10    |              |
| $\mu_{move}$      | Amplitude of inputs to move node                      | 0.417 |              |
| $\mu_{fix}$       | Amplitude of inputs to fix node                       | 0.331 |              |
| $D$               | Delay of excitatory inputs to move and fix nodes (ms) | 47    |              |
| $\vartheta$       | Decision threshold                                    | 28    |              |
| $D_{control}$     | Delay for blocking inputs in response to signal (ms)  | 90    |              |
| $\mu_{move-post}$ | Amplitude of inputs to move node after $D_{control}$  | 0     | $\mu_{move}$ |

9

10 **Table 2.** Model parameters for 200N-DINASAUR, as used in **Figures 2 and 3**. Grey boxes  
 11 indicate those parameters unchanged from Bompas & Sumner (2011). The IGNORE condition is  
 12 identical to previous work, except the distractor is now central instead of opposite to the  
 13 target. The STOP condition differs from the IGNORE condition only in the endogenous response  
 14 to the signal onset (white boxes) but no new parameter is introduced.

| Name           | Description                                                         | IGNORE | STOP |
|----------------|---------------------------------------------------------------------|--------|------|
| $ECC_{dist}$   | Distractor eccentricity in SC (mm)                                  | 0      |      |
| $ECC_{targ}$   | Target eccentricity in SC (mm)                                      | 1.76   |      |
| $\beta$        | Steepness of spiking function                                       | 0.07   |      |
| $\tau$         | Decay time constant (ms)                                            | 10     |      |
| $\tau_{on}$    | Transience of exo inputs                                            | 10     |      |
| $Act$          | Short-range activation                                              | 40     |      |
| $Inh$          | Long-range inhibition                                               | 55     |      |
| $\sigma$       | SD of spatial profile for lateral connections and inputs in SC (mm) | 0.7    |      |
| $k$            | Leakage                                                             | 1      |      |
| $\eta$         | Noise amplitude                                                     | 50     |      |
| $Th$           | Decision threshold                                                  | 0.85   |      |
| $\delta_{out}$ | Output time (ms)                                                    | 20     |      |

|                        |                                                                                     |                   |                |
|------------------------|-------------------------------------------------------------------------------------|-------------------|----------------|
| $\delta_{vis}$         | Visual delay (ms)                                                                   | 50                |                |
| $\delta_{endo}$        | Endogenous delay (ms)                                                               | 75                |                |
| $a_{exo}$              | Amplitude of exo inputs                                                             | 80                |                |
| $a_{endo,target}$      | Amplitude of endo inputs to the target                                              | 14                |                |
| $a_{endo,fix}$         | Amplitude of endo inputs at fixation                                                | 10                |                |
| $a_{endo,target-post}$ | Amplitude of endo inputs to the target after SOA + $\delta_{endo}$ in signal trials | $a_{endo,target}$ | 0              |
| $a_{endo,fix-post}$    | Amplitude of endo inputs at fixation after SOA + $\delta_{endo}$ in signal trials   | 0                 | $a_{endo,fix}$ |

1

2 When using the published parameters, the SIGNAL-IGNORE scenario in Blocked Input 2.0  
3 was not able to produce the characteristic phenomenon of saccadic inhibition: dips in the  
4 distribution (**Figure 3A**). Instead, the model predicts only a partial recovery from the  
5 interference, leading to many saccades being inhibited (51% for Monkey C, 78% for Monkey  
6 A), despite the instruction to ignore. In contrast, integrating the main idea from Blocked Input  
7 into the endogenous node within DINASAUR provides good generalization between IGNORE  
8 and STOP conditions (Figure 3B and D).

9

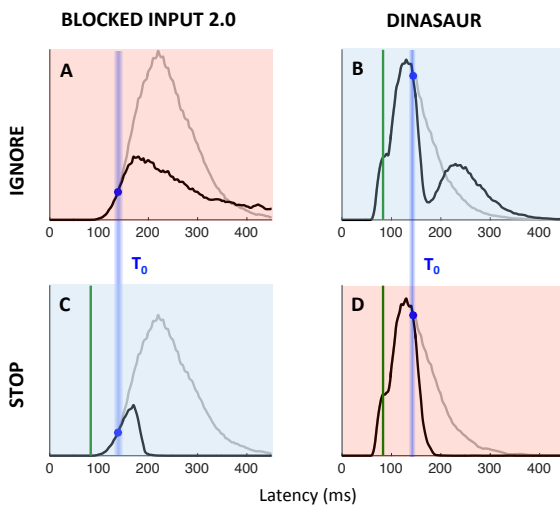

10

11 **Figure 3.** Simulated RT distributions from 10,000 trials using Blocked Input 2.0 (A,C) and 200N-  
12 DINASAUR (B,D) for signal onset (green line) at SOA 83 ms. Blue shaded areas indicate those  
13 instantiations of each models as published. Red shaded areas indicate predictions for new  
14 conditions based on the assumptions described in **Figure 2**. The DINASAUR model (with blocked  
15 input for stopping) captures well the typical pattern of results obtained in both paradigms.  
16 Blocked Input 2.0 (with automatic fixation activity for ignore conditions) is not able to produce  
17 the sharp dips expected from the saccadic inhibition literature (but see Blocked Input 3.0 and  
18 Figures 4-5). Both models predict a perfect alignment across instructions of the time when the  
19 signal RT distribution (black) departs from the NO-SIGNAL RT distribution (grey), indicated by  
20 the blue dots ( $T_0$ ) and highlighted by blue vertical bars. Note that the difference in mean and  
21 variance of the RT distributions between the models simply reflects the parameters inherited  
22 from previous publications; they have never been fitted to the same behavioral distributions.  
23 Relatedly, the position of  $T_0$  (blue dots) relative to the baseline distribution merely depends on  
24 where that distribution lies relative to signal onset (the SOA). The important aspect here is  
25 generalization ability of each model across instructions.

1 **2.4. Blocked Input 3.0**

2 We also test a simple upgrade of the Blocked Input 2.0 model. Taking inspiration from  
 3 DINASAUR’s ability to capture the saccadic inhibition paradigm, we introduce a similar split  
 4 between fast exogenous and slower selective signals into Blocked Input, which now allows the  
 5 amplitude of these 2 streams of signal to vary independently as a function of the instruction.  
 6 **Figure 4** illustrates the relationship across all three models discussed in the present article.

7

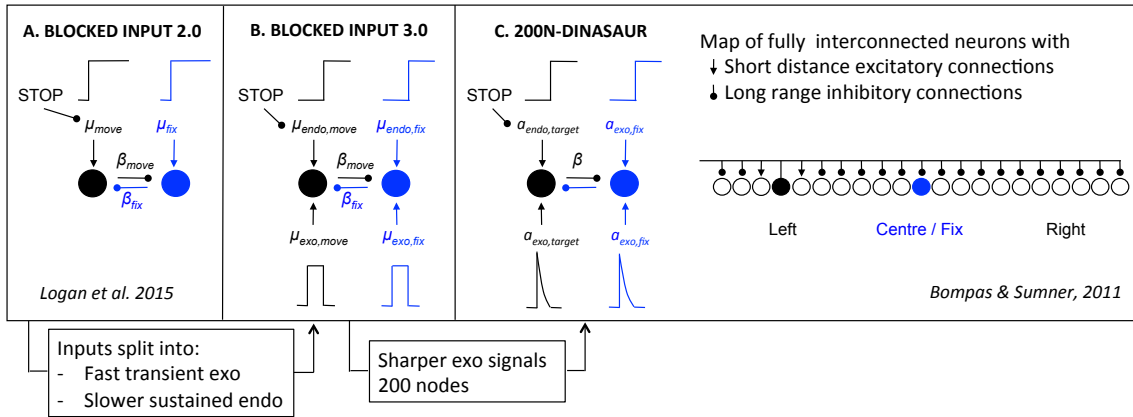

8

9 **Figure 4.** Overview of models and their relationships. **A.** Blocked Input 2.0 as in Logan et al.  
 10 2015. **B.** Blocked Input 3.0 integrates aspects of DINASAUR into Blocked Input 2.0 in an attempt  
 11 to capture the SIGNAL-IGNORE condition. Its inputs are split into two conceptually different  
 12 streams: a fast and transient drive tied to visual onsets (exogenous) and a slower sustained  
 13 drive tied to instructions (endogenous). **C.** 200N-DINASAUR is a map of fully interconnected  
 14 neurons representing part of the left, central and right visual fields, invented to capture  
 15 simplified SC dynamics. The temporal dynamics of its exogenous signals (quick growth and  
 16 exponential decay) is a key factor for creating sharp dips and quick recovery.

17

18 **Table 3** presents the parameters specific to Blocked Input 3.0. We first attempt to inherit  
 19 all parameter values from Blocked Input 2.0, without adding any new free parameter. In order  
 20 to leave the NO-SIGNAL distribution unchanged between Blocked Input 2.0 and 3.0, we set the  
 21 duration of exogenous signals as the difference between  $D_{control}$  and  $D$ . Therefore, the inputs to  
 22 the target node following target onset are the same under both models (a step function  
 23 starting after delay  $D$ , **Figure 5A-B**). As can be seen on the simulated RT distributions (**Figure**  
 24 **5C**), this variant improves on Blocked Input 2.0 in that most saccades now recover from  
 25 distractor interference in the IGNORE condition, which is crucial to observe dips, the hallmark  
 26 of saccadic inhibition. The reason for this improved recovery is that the bottom-up signal  
 27 associated with the return of fixation is temporary (discontinued blue line on **Figure 5A**),  
 28 rather than sustained (compare with Figure 2B).

29 However, the simulated dip remains much shallower than in behavioral data. In Blocked  
 30 Input 3.1, we therefore decoupled the amplitude of exogenous and endogenous signals, to  
 31 allow the exogenous transient signals to be larger (continuous blue line on **Figure 5A**). For  
 32 instance, multiplying the exogenous signals by 3 creates much larger dips, now comparable in  
 33 amplitude to typical data observed in saccadic inhibition. The STOP condition would now also  
 34 contain this initial strong fixation signal, dropping back to the sustained level in Blocked input  
 35 2.0 after a short delay (**Figure 5B**). This slightly reduces the number of failed stops (**Figure 5F**).

1 This upgrade is reminiscent of the Boosted Fixation model, also proposed (and rejected) in  
 2 Logan et al. (2015). However, contrary to Boosted Fixation, the extra fixation drive here is only  
 3 temporary.

4

5 **Table 3.** Description and values of new parameters introduced in Blocked Input 3.0 and 3.1.  
 6 Blocked Input 3.0 assumes all parameter values are equal to published values from Blocked  
 7 Input 2.0 (grey boxes), while Blocked Input 3.1 adds one free parameter: the amplitude of the  
 8 exogenous input triggered by signal onset (white box).

| Name              | Description                                                | 3.0                      | 3.1             |
|-------------------|------------------------------------------------------------|--------------------------|-----------------|
| $\mu_{exo,move}$  | Amplitude of exo inputs to move node                       | $\mu_{move}$ (from 2.0)  |                 |
| $\mu_{exo,fix}$   | Amplitude of exo inputs to fix node                        | $\mu_{fix}$ (from 2.0)   | $\mu_{fix} * 3$ |
| $\mu_{endo,move}$ | Amplitude of endo inputs to move node                      | $\mu_{move}$ (from 2.0)  |                 |
| $\mu_{endo,fix}$  | Amplitude of endo inputs to fix node                       | $\mu_{fix}$ (from 2.0)   |                 |
| $D$               | Delay of exogenous inputs (ms)                             | $D$ (from 2.0)           |                 |
| $D_{Control}$     | Delay of endogenous inputs (excitatory and inhibitory, ms) | $D_{Control}$ (from 2.0) |                 |

9

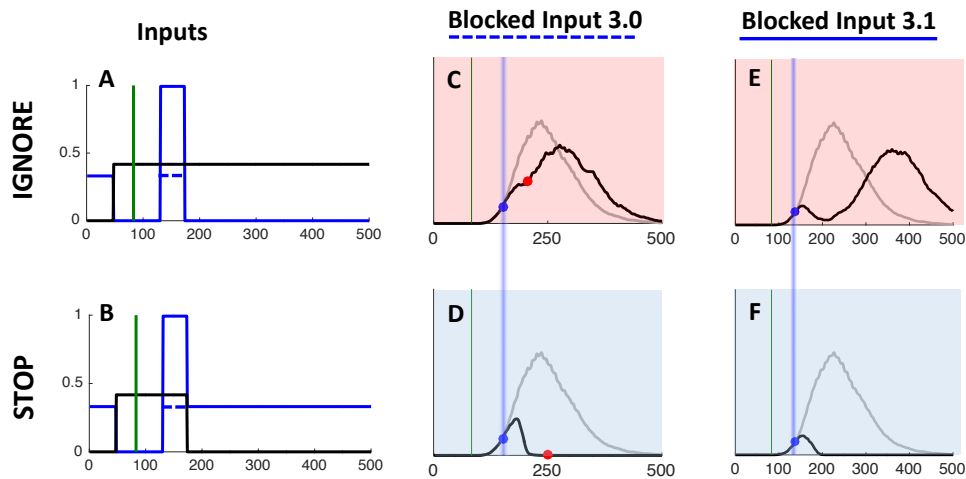

10

11 **Figure 5.** Inputs and simulations from Blocked Input 3.0 and 3.1. **A-B.** In the most  
 12 straightforward generalization from Blocked Input 2.0, we assume in Blocked Input 3.0 that the  
 13 transient visual signals associated with signal onset are the same size as the original fixation  
 14 inputs in Blocked Input 2.0 (discontinuous blue line). Blocked Input 3.1 assumes that the  
 15 transient activity from the signal is larger (in this case 3 times higher) than the baseline fixation  
 16 amplitude (continuous blue line). **C.** Simulated RT for Blocked Input 3.0 shows some dip, but this  
 17 remains very shallow. **D.** The STOP condition for Blocked Input 3.0 is the same as for Blocked  
 18 Input 2.0. **E-F.** Simulated RTs for Blocked Input 3.1 now show a clear dip and recovery as  
 19 expected in the SIGNAL-IGNORE condition (E), while still capturing the SIGNAL-STOP condition  
 20 (F).

21 Blocked Input 3.1 confirms that splitting signals into distinct transient exogenous and  
 22 sustained endogenous drives is an important property for allowing the model to capture new  
 23 tasks. Not only does this splitting allow us to decouple the amplitude of both drives, but it also  
 24 creates a straightforward relationship between, on the one hand, visual events and exogenous

1 signals, and on the other hand, the instructions and endogenous signals. However, despite this  
 2 improvement, the dips created by Blocked Input 3.1 tend to recover too slowly, producing too  
 3 long a tail compared with observed data and to simulations using the DINASAUR model. This  
 4 highlights the importance of the temporal profile of exogenous signals. In DINASAUR, the step  
 5 increase followed by exponential decay allows the interference to be maximal for a very short  
 6 time window, and then for the system to recover quickly. Importing this property into Blocked  
 7 Input 3.1 would doubtless improve the model's performance. But rather than creating an  
 8 amalgam model from this direction, in the remaining of the article, we use DINASAUR as the  
 9 base model and inherit the spirit of Blocked Input for the behavior of endogenous signals  
 10 during countermanding. This merger already captures the iconic behavior of the two  
 11 paradigms as shown in Figure 3.

12

### 13 **2.5. Comparison to recordings in FEF neurons**

14 One of the strengths of Blocked Input 2.0 was its ability to capture not only monkey behavior  
 15 but also that of fixation and movement neurons recorded within the frontal eye field of these  
 16 monkeys, as previously published in Hanes et al. (1998) and Boucher et al. (2007). As explained  
 17 above, DINASAUR appears better able to generalize across behavior in different tasks than  
 18 Blocked Input 2.0, 3.0 and 3.1. The next critical question is how well DINASAUR approximates  
 19 activity in fixation and movement neurons. **Figure 6** shows that firing rates from DINASAUR  
 20 and Blocked Input models are quite comparable (**panels A-C**), and that DINASAUR accounts  
 21 equally well for the growth and decay rates from FEF neurons during successful inhibition  
 22 (**panel D**) highlighted in Logan et al. (2015). Figure 6 was designed to match Figures 13 and 14  
 23 in Logan et al. (2015) and the reader should refer to this work for a full justification.

24

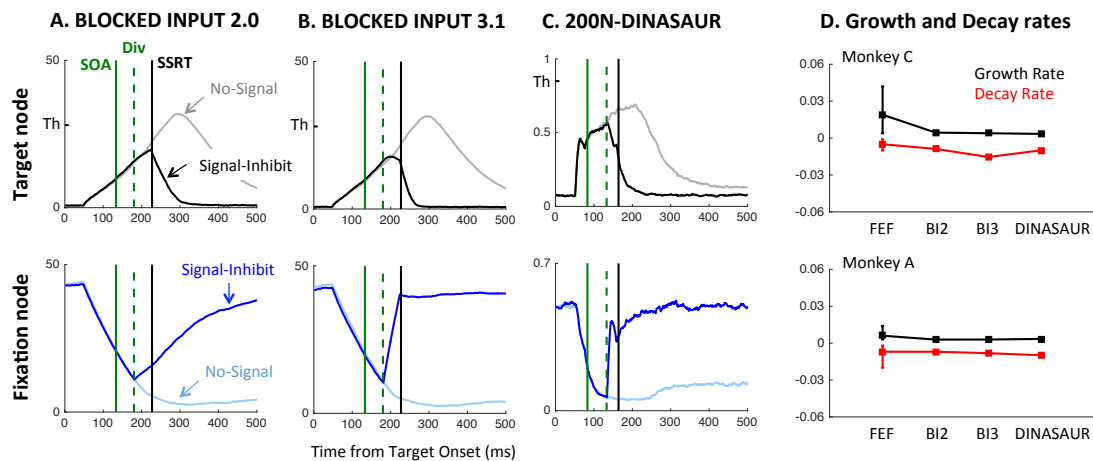

25

26 **Figure 6. A-C.** Mean firing rates from 1000 simulated trials using each model under the STOP  
 27 condition, at the target and fixation nodes. The solid green line indicates the signal onset, here  
 28 chosen at SOA 133, matching the experiments presented in section 4. The dashed green line  
 29 shows the divergence time, i.e. the time at which this signal starts having an effect on the  
 30 neuronal map, while the black vertical line indicates the SSRT, estimated from the simulated RT  
 31 from each model. Activity was averaged across trials leading to successful inhibition (black and  
 32 dark blue lines, Signal-Inhibit trials) and compared with “latency matched” No-Signal trials  
 33 (grey and light blue lines; i.e. No-Signal trials in which latency is greater than  $SOA+T_0$ ). On the  
 34 y-axis for the target node,  $Th$  indicates the saccade initiation threshold (although this is not

1 directly relevant for average firing rates, see text). **D.** Mean growth and decay rates from FEF  
2 neurons and simulations from each model (BI2 and BI3 refer to Blocked Input 2.0 and 3.1  
3 respectively), using the same format as Figure 14 in Logan et al. (2015).

4  
5 Panels A-C on Figure 6 contrast the mean firing rates between successful inhibition in  
6 SIGNAL trials and comparable NO-SIGNAL trials (i.e. NO-SIGNAL trials leading to a saccade  
7 being executed after the dip onset). In all models, target activity starts rising after a delay  
8 following target onset, while fixation activity decreases following fixation offset, irrespective of  
9 whether a signal is present or absent. On NO-SIGNAL trials, the fixation activity carries on  
10 decreasing (light blue lines), while the move activity carries on rising until it reaches a peak and  
11 then returns to baseline (grey lines). In neuronal recordings, this return to baseline is  
12 presumably related to triggering a saccade, and to mimic this effect in all our simulations, we  
13 interrupted the visual input to the peripheral target node each time a saccade was triggered in  
14 the model. This has of course no effect on the simulated RT distribution.

15 On SIGNAL trials, following the signal (green solid lines), activity rises again at fixation  
16 (dark blue lines), resulting in a decrease in move activity (mediated by lateral inhibition),  
17 further emphasized by the suppression of inputs to the move/target node. Panels A-C also  
18 show the divergence time (green dashed lines); the time at which this signal starts having an  
19 effect on the target node (the separation of grey and black lines). In all models, this time is  
20 equal to  $SOA + \delta_{vis}$ . All trials where the threshold is reached before this divergence time escape  
21 all influence from the signal and will therefore result in a failure to withhold the saccade  
22 (Signal-Respond trials). All trials where the threshold has not been reached by this time will be  
23 influenced by the signal to some extent. On some trials, the interference will be sufficient for  
24 the saccade to be correctly withheld (Signal-Inhibit category). On others, this interference may  
25 not be strong enough and the saccade is produced with a delay. This delay can be very short  
26 (as little as 1ms if the firing rate was very close to the threshold when the signal starts  
27 interfering), or much longer (up to 200 ms, see Bompas & Sumner, 2015). This variety means  
28 that recovery of saccades is already happening throughout the behavioral dips, rather than  
29 being restricted to the observed 'recovery phase'. Although  $\delta_{vis}$  is kept constant and thus the  
30 interference starts at the same time on every trial, the dips in the generated behavioral  
31 distribution are more spread, matching those observed in empirical data.

32 The key difference between the models is that interference from the signal (the return of  
33 fixation activity and consequent lateral inhibition) increases in sharpness when going from  
34 Blocked Input 2.0 to Blocked Input 3.1 and to DINASAUR, illustrating the key property that  
35 makes DINASAUR able to produce sharp dips. Note that the downturn of target activity is  
36 already dramatic at the divergence time in DINASAUR, caused by the exogenous signal alone.  
37 In Blocked Input, the initial divergence is more subtle, and relies on the blocking of  
38 endogenous input for activity to take a severe downturn. Nevertheless, Panel B confirms the  
39 intuition from Logan et al. (2015) that a temporary boost of fixation following the signal  
40 (Blocked Input 3.1) would indeed capture neural dynamics.

41 The figure also shows the SSRT estimated from the simulated behavior for comparison  
42 (black vertical lines), using the integration method (Verbruggen, Chambers, & Logan, 2013).  
43 We can see that the SSRT is always later than the divergence time and we will come back to  
44 the relationship between the two measures in section 5. Lastly, note that, when averaged over  
45 a large number of trials, mean node activity in DINASAUR never reaches the initiation  
46 threshold, contrary to Blocked Input models. However, whether and when the *mean* activity

1 reaches threshold is not directly relevant: in either class of model, the RT on each trial is  
2 determined by when the noisy activity reaches the threshold, and – due to the noise – this  
3 happens most of the time before the average trace reaches the threshold. Therefore, this  
4 apparent difference across models merely reflects the temporal profiles of accumulation  
5 (affected by the balance of self-excitation and leakage).

6 While firing rates from Blocked Input 2.0 bear most resemblance to those motor neurons  
7 recorded in Monkey A, firing rates from DINASAUR resemble closely those visuo-movement  
8 neurons recorded in Monkey C (Figure 5 in Logan et al., 2015). Although there are potentially  
9 important differences between the two neuronal populations (Ray, Pouget, & Schall, 2009), on  
10 which we will come back in Discussion, activity within both neuron types modulate at about  
11 the same time and show similar growth and decay rates, as stated in Logan et al. (2015). Figure  
12 6D shows that DINASAUR provides growth and decay rates very similar to those in Blocked  
13 Input 2.0, accounting well for neuronal recordings in both monkeys. To construct panel D, we  
14 digitized the FEF data from Figure 14 in Logan et al. (2015), and ran simulations from each  
15 model following the same procedure as they used (see their Appendix C). Briefly, we simulated  
16 the models using the same SOAs and trial numbers as those from the FEF recordings (SOA  
17 ranging from 68 to 184 ms, and trial numbers varying from 61 to 130). For each SOA and  
18 monkey, the firing rate was averaged across the trials and divided by the initiation threshold.  
19 Minimum (M) and peak (P) mean firing rates were extracted, as well as the difference between  
20 these ( $D = P - M$ ). The growth and decay rates were calculated on two sections of the curve,  
21 where the growth and decay are almost linear (i.e. the portion increasing from 25 to 75% of D  
22 ( $M + D * 0.25$  to  $M + D * 0.75$ ) for the growth rate, and the portion decreasing from 75 to 25%  
23 of D for the decay rate). It is clear that estimates from each model were within the range of  
24 estimates from neurons, similarly so across models.

25

## 26 **2.6. Empirical prediction: universality of dip onsets**

27 Irrespective of how well each model performs overall, a crucial observation in all our model  
28 simulations is that the time point when latency distributions diverge is exactly the same under  
29 both instructions (blue dots and lines on **Figure 3 and 5**). This is a basic prediction as soon as  
30 the initial neuronal response to the stop signal is conceptualized as automatic (and as long as  
31 non-decision time is not modulated by the different contexts, see below). In our previous work  
32 on saccadic inhibition, we have referred to this divergence point as dip onset or  $T_0$  and, using  
33 DINASAUR, we have shown that  $T_0 - SOA$  directly reflects non-decision time (Bompas et al.,  
34 2017; Bompas & Sumner, 2011, 2015). Below we explain why the relationship between  $T_0$  and  
35 non-decision time should hold overall irrespective of the model, and why we expect  $T_0$  to  
36 remain mostly unchanged across instructions.

37

38 *Dip onset reflects non-decision time.*

39 The conceptual approach that dip-onset is a direct reflection of the sum of the sensory delay  
40 and the motor output delay (non-decision time) was validated by varying the luminance  
41 contrast and color of distractors (Bompas & Sumner, 2011), using dips as a behavioral  
42 electrode for precisely determining sensory delay. This relationship is not expected to be  
43 model-specific, since it depends simply on the logic of what non-decision time is – the portion  
44 of the RT that is not influenced by decision / selection processes (i.e. not influenced by a  
45 distractor signal). Neither should  $T_0$  *theoretically* depend on the shape of what follows – a



1 sharp or gradual divergence or a true ‘dip’ (which implies divergence and then recovery).  
2 However, it should be noted that  $T_0$  is only directly observable in simulations or data if the  
3 distractor signal SOA allows the dip to fall within the main body of the RT distribution and if  
4 there are enough trials to allow little or no smoothing (smoothing is known to anticipate dip  
5 onsets). Its estimate could therefore slightly vary across models depending on the shape of the  
6 distributions. In Figure 3, simulations from Blocked Input 2.0 and DINASAUR were smoothed  
7 using the same procedure as real data and produce  $T_0$  respectively at 138 ms and 143 ms at  
8 SOA 83, irrespective of the instruction; that is respectively 55 and 60 ms following the  
9 distractor, while their respective non-decision times are 60 and 70 ms. Note that the  
10 differences in non-decision time across models are not relevant here as these result from  
11 fitting model parameters over completely different datasets and have never been contrasted  
12 before. What matters for now is that  $T_0$  offers a good estimate of non-decision times for any  
13 model (but will often anticipate it by 5 to 10 ms depending on the RT distribution and  
14 smoothing).

15

16 *Should  $T_0$  remain unchanged across contexts?*

17 One could argue that non-decision time may well differ under stop and ignore instructions,  
18 because of the associated attentional or strategic pro-active adjustments participants would  
19 likely make. Indeed, previous work using selective slowing paradigms (Bissett & Logan, 2014)  
20 has shown that, under the stop instruction, participants slow down to avoid making too many  
21 errors, in a similar fashion as when adjusting their behavior under accuracy versus speed  
22 instructions. It is therefore conceivable that  $T_0$  would be longer under the stop condition  
23 compared with the ignore condition, therefore contributing to the overall slowing. On the  
24 other hand, the stop condition requiring more attention to be paid to the stop signal, it is also  
25 conceivable that this would lead to improved sensory processing of the signal (Elchlepp, Lavric,  
26 Chambers, & Verbruggen, 2016) and therefore possibly to a shortening of  $T_0$  compared with a  
27 condition where the signal should be ignored.

28 Previous research in the field of saccadic inhibition has consistently and clearly shown  
29 that  $T_0$ , and therefore non-decision time, is mostly insensitive to pro-active slowing. For  
30 instance, Reingold and Stampe (2002) showed that dip timing was on average 4 ms *later*  
31 during pro-saccade blocks than during anti-saccade blocks, despite RTs being 100 ms faster.  
32 This being said, this difference was significant, which could suggest small but genuine  
33 modulations of non-decision time by instructions or ‘task-set’. In any case, these remain  
34 negligible compared with the modulations in decision time.

35 Although the SSRT has long been conceived as the delay required to inhibit action, it is  
36 now clear that a large proportion of this time is devoted to non-decision time, while the  
37 inhibitory component is rapid and late (Boucher, Palmeri, et al., 2007). SSRT is sensitive to the  
38 salience of the stop signal and insensitive to fixation offsets (Morein-Zamir & Kingstone, 2006),  
39 just like  $T_0$  in a saccadic inhibition paradigm (Bompas & Sumner, 2011; Reingold & Stampe,  
40 2002). These findings suggest that SSRT likely behaves like  $T_0$ , and therefore we expect the  
41 early part of the interference from stop-signals and distractors should be very similar in  
42 saccadic inhibition and countermanding. This leads to the strong prediction that  $T_0$  should  
43 remain the same across contexts (within a few ms), providing the same stimuli are used and  
44 only the instructions differ. In Sections 3 and 4, we test this empirical prediction, which  
45 constitutes the 1<sup>st</sup> step for our approach of unifying paradigms and models by regarding the  
46 first ‘inhibitory’ signal as fully automatic and therefore fully independent of instructions (note

1 that this is actually an overly stringent definition of automatic; we will return in Discussion to  
2 the concept of conditional automaticity, whereby cascades of neuronal activation considered  
3 automatic are nevertheless modulated by context).

## 4 5 **2.7. Modeling prediction: “one latency fits all” top-down delay**

6 A second key consequence from Section 2 is that top-down inhibition does not need a  
7 different delay from top-down drive. Rather, once endogenous and exogenous signals are  
8 explicitly separated, like in DINASAUR and Blocked Input 3, endogenous delays can all be  
9 captured by one variable, which constrains the latency of four events: 1) endogenous support  
10 for the target following target onset, 2) the removal of endogenous support for fixation  
11 following target onset, 3) the removal of endogenous support for the target following the  
12 signal under the stop instruction and 4) endogenous support returning to fixation following the  
13 stop instruction. This makes strong predictions when directly contrasting behaviors across  
14 conditions and paradigms, as this single parameter will now directly influence the NO-SIGNAL,  
15 SIGNAL-IGNORE and SIGNAL-STOP distributions across all SOAs.

16 Furthermore, this single endogenous delay is not even a free parameter in DINASAUR, but  
17 is defined as exogenous delay + a fixed delay of 25 ms. The assumption that  $\delta_{endo}$  directly  
18 depends on  $\delta_{vis}$  reflects the idea that both exogenous and endogenous delays in sensorimotor  
19 decision tasks are linked to sensory signals, but endogenous signals are filtered by task  
20 relevance (Bompas & Sumner, 2011). This additional filtering process implies a longer route  
21 through the brain before entering motor competition, but the time at which these selective  
22 signals can be made available remains dependent on how fast the raw signals can reach these  
23 higher-level areas, i.e. the exogenous delay. Therefore, stronger signals will travel quicker  
24 within the brain, both straight to the decision area ( $\delta_{vis}$ ), and via the filtering process for task  
25 relevance ( $\delta_{endo}$ ). This 25 ms difference would in principle vary depending on the exact task  
26 and participants without changing the spirit of DINASAUR. The original model, inspired from  
27 the activity in SC neurons of monkeys, actually used a 50 ms difference (with  $\delta_{vis}$  of 70,  
28 Trappenberg et al., 2001). Here the 25 ms is simply inherited from our previous modeling of  
29 saccades in humans (Bompas & Sumner, 2011).

30 In Section 5, we test whether DINASAUR can, under these strict assumptions and with the  
31 stopping behavior inspired from Blocked Input, capture all aspects of our data. We show that  
32 this is the case, as long as we allow a minor refinement to the model to account for trials  
33 where human participants occasionally fail to maintain the stop instruction and ignore a stop-  
34 signal.

## 35 36 **3. Empirical data – Methods**

### 37 **3.1. Rationale for Experiments 1 and 2**

38 The behavior of humans and monkeys during the stop task or saccadic inhibition has been  
39 described many times, forging strong expectations for what empirical distributions will look  
40 like in each paradigm separately (Figure 1) and justifying the modeling endeavor from both  
41 fields (Figures 2-3). However, these paradigms have never been tested on the same  
42 participants and using the same stimuli. In the manual domain, ignore conditions have been  
43 used in stop paradigms, a paradigm known as “selective stopping” (see Bissett & Logan, 2014  
44 for a review). This paradigm would typically introduce two types of signals, one requiring a

1 stop and the other indicating the action should carry on (Verbruggen & Logan, 2009), or would  
2 involve two actions, one that should be inhibited (left hand movement) while the other should  
3 carry on (right hand movement). However, the nature of the analysis performed was quite  
4 different to our present ambition. As described above, our main aim for introducing new  
5 empirical data was two-fold. First, we aimed to test the prediction that the initial disruption to  
6 RT distributions is the same irrespective of instruction, suggesting that it is driven by  
7 automatic, rather than top-down inhibition. More specifically, this can be assessed by directly  
8 comparing dip onsets across instructions, as all models under this generalization hypothesis  
9 predicted perfect temporal alignment of dip onsets across conditions. Secondly, we aimed to  
10 test whether the later effects of the signal under each instruction can be captured within one  
11 single model with one set of parameters. This would suggest that distributions of failed stop  
12 can be fully predicted from the ignore condition by simply blocking the ability for saccades to  
13 recover, ultimately linking both phenomena to automatic interference from exogenous signals.

14 In order to answer these questions, we needed to directly compare aspects of the RT  
15 distributions between contexts. Here there is a complication, which led us to conduct two  
16 separate experiments. Identical baseline (NO-SIGNAL) trials produce slower responses when  
17 participants know they might have to occasionally stop (as in a countermanding experiment)  
18 compared with when they are always allowed to ignore stimuli that come after the target (as  
19 in a saccadic inhibition experiment). This context-dependency is known as 'proactive slowing'  
20 (slowing of responses as a preparatory precaution given the possibility of having to stop,  
21 Verbruggen, Best, et al., 2014; Verbruggen & Logan, 2009). For this reason, we must compare  
22 SIGNAL-IGNORE and SIGNAL-STOP trials to their own NO-SIGNAL trials from the same block,  
23 rather than using the same baseline (as simulated in Figure 3). But further, too much  
24 distribution shift between conditions would hamper direct comparison. When RTs are very  
25 quick, only short SOAs produce detectable dips (as later ones only affect the very tail of the  
26 distribution, where hardly any saccades occur). But very short SOAs are not optimal to study  
27 stopping behavior, as only very few fails would then be observed. To be able to compare  
28 behavior using an identical set of SOAs, we needed to ensure that the baseline distributions in  
29 the two contexts would overlap to considerable degree, even though some difference was  
30 inevitable.

31 To minimize proactive slowing in our design, in **Experiment 1** we introduced a small  
32 number of trials requiring stopping in all blocks. To do this we included two types of signal,  
33 which we call 'common' and 'rare'. In the IGNORE context, participants were asked to ignore  
34 the common signal but stop to the rare signal. This was reversed for the STOP context. Rare  
35 and common signals had identical properties except the rare was black (not illustrated) and  
36 the common white (Figure 1 and 2A). Only responses to no-signal and common-signal trials  
37 were included in further analyses; the rare signal was present only to minimize differences in  
38 proactive slowing between the blocks. Differences remained, but this manipulation ensured  
39 the two baseline distributions were similar enough to measure  $T_0$  in all SOAs in both contexts.  
40 Our design is akin to "stimulus selective stopping" designs, which have been commonly used in  
41 the context of the manual stop task (see Bissett & Logan, 2014 for a review) and typically  
42 analyzed within the framework of the independent race model. Note that here we blocked the  
43 instruction to the common signal, rather than interleaving all three trial types (no-signal,  
44 signal-ignore and signal-stop) within the same blocks. This allows us to keep the exact same  
45 visual stimulus as signal and provides the strongest test for our prediction. Indeed, if  $T_0$  is fully  
46 constrained by automatic processes, it should depend only on the visual properties of the  
47 signal, and not the instructions, and this should remain true even when across blocks.

1            However, Experiment 1 also created a small recovery phase in the latency distribution for  
2 the STOP context. This may reflect particularly high levels of confusion in our participants, due  
3 to the interleaved presence of rare and common signals, and therefore to an increased failure  
4 to trigger the inhibition on STOP trials. Therefore, we validated our findings in **Experiment 2** on  
5 a new sample, without the rare signal trials. This created the expected large shift between the  
6 two baseline distributions, making the long SOAs inefficient in the IGNORE context, and the  
7 short SOAs suboptimal in the STOP context. However, the same conclusions could be drawn  
8 from both experiments.

### 10 **3.2. Participants**

11 These experiments took a psychophysical approach in which few participants provided  
12 thousands of trials (between 5000 and 8000 each) to generate reaction time distributions, akin  
13 to neurophysiology studies that use non-human primates as subjects. The reason for this  
14 approach is that dips are a very robust phenomenon, found in every single participant tested  
15 throughout the saccadic inhibition literature on humans and primates, while the critical aspect  
16 is the accurate estimate of  $T_0$ , which benefits from collecting a large number of trials per  
17 condition. Nine participants (5 female) with normal or corrected to normal vision took part (4  
18 in Exp 1 and 5 in Exp 2). One participant in Exp 2 was excluded because his accuracy on the  
19 stop task was around 2%. All participants were naïve to the purpose of the experiments.

### 21 **3.3. Materials**

22 A Tobii TX300 eye tracker with a 300 Hz sampling rate was used to collect saccade data.  
23 Participants were seated approximately 60cm from the screen where exact position of the eye  
24 in 3D space was calculated through algorithms supplied by the Tobii software for each time-  
25 point sampled. Eye position was calibrated using a 9-point calibration array at the start of  
26 every session and after every 600 trials (one block). A 23 inch (51 by 29cm) LCD screen with a  
27 60Hz refresh rate was used to present stimuli. The lights in the room were switched off but the  
28 room was not in total darkness.

### 30 **3.4. Stimuli and procedure**

31 The two main trial types are illustrated in Figure 1 and 2A. Briefly, all trials began with a central  
32 fixation point, a white circle  $0.4^\circ$  visual angle in diameter ( $200 \text{ cd/m}^2$ ), presented on a grey  
33 background for 700ms ( $58 \text{ cd/m}^2$ ). This was immediately followed by a target with the same  
34 properties as the fixation point but either  $12^\circ$  visual angle to the left or right of the center of  
35 the screen on the vertical midpoint. For no-signal trials (60% of trials), the target appeared for  
36 1000ms and no other stimuli were presented. Both **Experiments 1 and 2** contained common-  
37 signal trials in which the target was followed by a larger white stimulus ( $1^\circ$  diameter,  $120$   
38  $\text{cd/m}^2$ ) appearing in the center of the screen after varying stimulus onset asynchronies (SOA:  
39 50, 83, 133 ms, due to the 60Hz refresh rate) until the end of the trial (i.e. until the main target  
40 disappeared). **Experiment 1** additionally contained rare signal trials (5% of trials), in which the  
41 distractor was black ( $1^\circ$  diameter,  $9 \text{ cd/m}^2$ ).

42 Participants were instructed to fixate on the central fixation point and then saccade as  
43 quickly as possible to the target that appeared randomly on the left or right of fixation (in  
44 equal frequencies). At the beginning of each block participants were given instructions to try

1 to withhold their eye movement whenever the relevant signal (white or black disc) appeared  
2 in the center of the screen. They were told to ignore the other signal and to make a saccade to  
3 target as normal. All participants were instructed to ‘respond as fast as possible whilst  
4 minimizing errors’. At the end of each block participants were given feedback on mean  
5 reaction time, percentage of failed stops and percentage successful ignores for the relevant  
6 stimuli.

7 Each participant completed over 5000 trials per experiment, divided into 24 blocks and 2  
8 contexts (12 blocks per context) spread over 4 sessions of 4 to 6 blocks each (approximately 1  
9 hour per session). Each session contained a run of 2 or 3 blocks of one context followed by a  
10 run of 2 or 3 blocks of the alternate context, presented in a counterbalanced order both within  
11 and across participants. The stimuli presented were identical across all blocks, however the  
12 required responses varied depending on the context.

13

### 14 **3.5. Data Analysis**

15 Raw gaze position data were first smoothed using a moving average with a window size of  
16 16.67ms and equal weighting across the window. Next saccades were detected using a velocity  
17 criterion of 35°/s, an acceleration of 6000°/s, and an amplitude of at least 6° (halfway to the  
18 target). Trials were excluded if there was loss of tracking (greater than 100ms) or blinks in the  
19 period 100ms before target onset to 100ms after saccade offset, or small saccades (under 6°)  
20 from 100ms before target onset. Each trial was visually inspected to ensure correct saccade  
21 detection by the algorithm and corrected where needed. Saccade latencies were calculated as  
22 the difference between target onset and saccade onset and then classified by trial type and  
23 context. All following analyzes are collapsed across left and right targets.

24 Next, saccade latency distributions were obtained for each participant for no-signal trials  
25 and common-signal trials for each SOA collapsed across all sessions, separated by context.  
26 Latency distributions were obtained with a bin size of 3.33ms (the refresh rate of the eye  
27 tracker was 300Hz). Given the difference in trial numbers between signal and no-signal trial-  
28 types, all distributions were scaled according to the number of trials still present within that  
29 condition after the exclusions listed above. Distributions of correct responses were then lightly  
30 smoothed using a Gaussian kernel with 7ms window size and 3ms standard deviation and  
31 interpolated to obtain 1ms precision, in line with Bompas et al. (2017) using similar trial  
32 numbers. Distributions using pooled data across observers and/or SOA used less smoothing  
33 (window = 5, SD = 1), in line with Bompas & Sumner (2011) using larger datasets. Note that for  
34 noisy distributions smoothing is necessary to robustly extract dip onset, but also anticipates  
35 dip onset. When more trials are available, smoothing becomes less necessary and less  
36 desirable for this reason.

37 In order to determine the onset and peak amplitude of the dip in saccade latency  
38 distributions a distraction ratio was calculated for each time-bin of the latency distributions  
39 where at least 1 trial was present in the no-signal condition (e.g Bompas & Sumner, 2011;  
40 Reingold & Stampe, 2002). This distraction ratio is the proportional change in the number of  
41 saccades made in the signal-present distribution relative to the number in the no-signal  
42 distribution. This is calculated for each time bin as:

$$43 \quad \text{Distraction ratio} = \frac{N(\text{no signal distribution}) - N(\text{signal distribution})}{N(\text{no signal distribution})}$$

1 The peak dip amplitude was calculated as the first time point of the maximum of the  
 2 distraction ratio where the difference in the two distributions was greater than 2 saccades and  
 3 the ratio was greater than 20%. Onsets of dips were defined as the point at which the  
 4 distraction ratio fell below 2% working backwards in time from the dip peak.

5

## 6 4. Empirical data - Results

### 7 4.1. Latency distributions

8 **Figure 7** shows the saccade latency distributions for a typical participant (P1 in Experiment 1)  
 9 in each context (see Appendix for all individual distributions and **Table 4** for main summary  
 10 statistics for both experiments), along with the simulations using 200N-DINASAUR (see section  
 11 5 for modeling details). As expected, the IGNORE context is characterized by dips in the  
 12 distribution following signal onsets, comparable to those in previous studies of saccade  
 13 inhibition (Bompas & Sumner, 2011; Buonocore & McIntosh, 2008, 2012; Buonocore &  
 14 McIntosh, 2013; Edelman & Xu, 2009; Reingold & Stampe, 2002, 2004). The distributions of  
 15 failed inhibitions in the STOP context also show dips, but these are followed by little or no  
 16 recovery, indicating mostly successful stops in the latter part of each distribution. Although  
 17 one can start to appreciate the temporal alignment of  $T_0$  across contexts, this is more clearly  
 18 illustrated by pooling across SOAs (section 4.2).

19 Table 4 also shows the SSRT estimates, obtained using the integration method  
 20 (Verbruggen et al., 2013). These were comparable to previous reports for saccade  
 21 countermanding in human (on average 134 ms, Hanes & Carpenter, 1999), i.e. about 32 ms  
 22 after dip onset and 30 ms longer than in rhesus monkeys (Hanes et al., 1998; Hanes & Schall,  
 23 1995; Paré & Hanes, 2003).

24

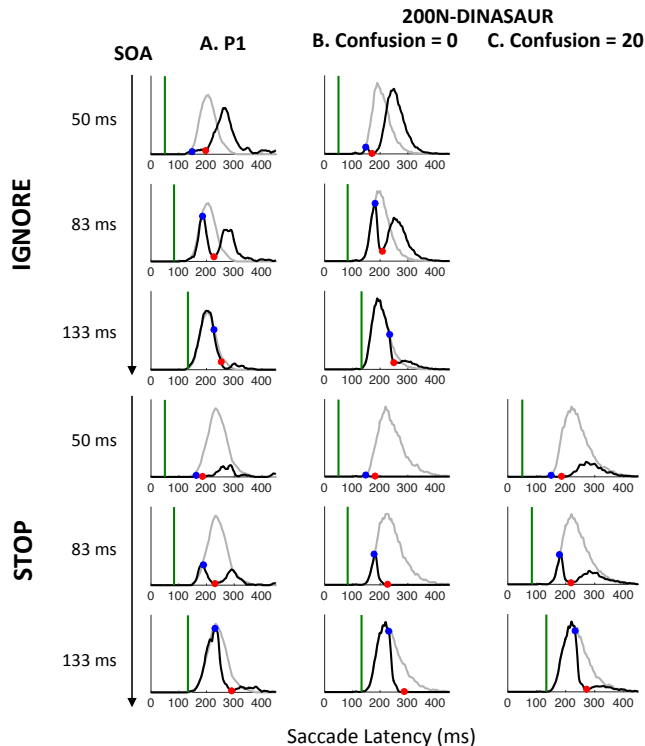

1 **Figure 7.** Latency distributions for Participant 1 in Experiment 1 across SOAs (rows) in the  
 2 IGNORE and STOP contexts (A), along with simulations from DINASAUR without (B) and with  
 3 (C) “confusion” (otherwise using parameter sets I1 and S1 on Table 5). Green bar indicates the  
 4 signal onset. Grey lines indicate distributions in which no signal was presented. Black lines  
 5 indicate distributions of trials in which a signal occurred. Blue dots indicate the dip onset (i.e.  
 6 where the distributions diverge, not necessarily where one takes a down-turn); red dots show  
 7 dip maximum.

8 **Table 4.** Summary of empirical data along with simulated measures from the DINASAUR model.  
 9 All measures are expressed in ms.  $T_{op}$  is the dip onset estimated from pooled distribution across  
 10 all SOAs locked on distractor onset (see Figure 8). Group estimates are either mean across  
 11 individuals (for mean RT and SD) or estimates from distribution data pooled across observers.

| Exp. 1   | IGNORE               |                       |                             | STOP                 |                       |                             |                          |
|----------|----------------------|-----------------------|-----------------------------|----------------------|-----------------------|-----------------------------|--------------------------|
|          | Mean RT<br>No-Signal | SD of RT<br>No-Signal | $T_{op}$ across<br>all SOAs | Mean RT<br>No-Signal | SD of RT<br>No-Signal | $T_{op}$ across<br>all SOAs | Mean SSRT<br>across SOAs |
| P1       | 207                  | 29                    | 91                          | 241                  | 36                    | 105                         | 139                      |
| P2       | 210                  | 42                    | 98                          | 239                  | 58                    | 100                         | 128                      |
| P3       | 189                  | 32                    | 73                          | 233                  | 57                    | 110                         | 136                      |
| P4       | 231                  | 27                    | 91                          | 261                  | 34                    | 98                          | 155                      |
| Group    | 209                  | 33                    | 96                          | 243                  | 46                    | 103                         | 138                      |
| DINASAUR | 208                  | 32                    | 98                          | 243                  | 50                    | 98                          | 130                      |
| Exp. 2   | IGNORE               |                       |                             | STOP                 |                       |                             |                          |
|          | Mean RT<br>No-Signal | SD of RT<br>No-Signal | $T_{op}$ across<br>all SOAs | Mean RT<br>No-Signal | SD of RT<br>No-Signal | $T_{op}$ across<br>all SOAs | Mean SSRT<br>Across SOAs |
| P1       | 170                  | 34                    | No dip                      | 288                  | 71                    | 109                         | 140                      |
| P2       | 195                  | 40                    | 96                          | 280                  | 60                    | 98                          | 119                      |
| P3       | 178                  | 29                    | 86                          | 290                  | 68                    | 101                         | 141                      |
| P4       | 132                  | 20                    | No dip                      | 289                  | 60                    | 96                          | 116                      |
| Group    | 169                  | 31                    | 95                          | 287                  | 65                    | 99                          | 131                      |
| DINASAUR | 174                  | 26                    | 98                          | 289                  | 63                    | 98                          | 134                      |

12

#### 13 4.2. Temporal alignment of dip onsets across contexts

14 **Figure 8** shows the expected strong linear relationship between dip onset, and the timing of  
 15 the distractor or stop signal, as well as the temporal alignment of dip onsets across the two  
 16 instructions. This locking of  $T_0$  on distractor onset justifies pooling across SOAs based on time-  
 17 since-distractor in order to improve the estimates of  $T_0$  by using all the available data, a  
 18 standard practice in many studies on saccadic inhibition (see section 3.5 and Reingold &  
 19 Stampe, 2002). Panels C-D show these Signal-to-Response latency distributions for each  
 20 participant and illustrate the temporal proximity of dip onsets across instructions. As expected,  
 21 strategic adjustments across conditions were large in Experiment 2 (where the two contexts  
 22 were kept fully separated) and meant the visual signal often arrived too late to have much  
 23 effect in the ignore condition, especially for the fastest participants (P1 and P4). Nevertheless,  
 24 when dips were observed in both contexts, these also appeared temporally aligned, confirming  
 25 the results from Experiment 1. The main result is summarized on **Figure 9**, after pooling across  
 26 participants.

27 Dip onsets in the present study are around 98 ms on average, slightly later than reported  
 28 previously, but it is known that stimulus properties affect dip onset (see e.g. Figure 6 in  
 29 Bompas and Sumner, 2011), and the precise timing of its detection is affected by trial numbers  
 30 and smoothing (Bompas et al., 2017). Dip maxima (red symbols) also occur at similar times in  
 31 each context, though the exact timing of dip maximum is affected by the properties of the  
 32 recovery, and thus less directly interpretable than dip onset (Bompas et al., 2017).

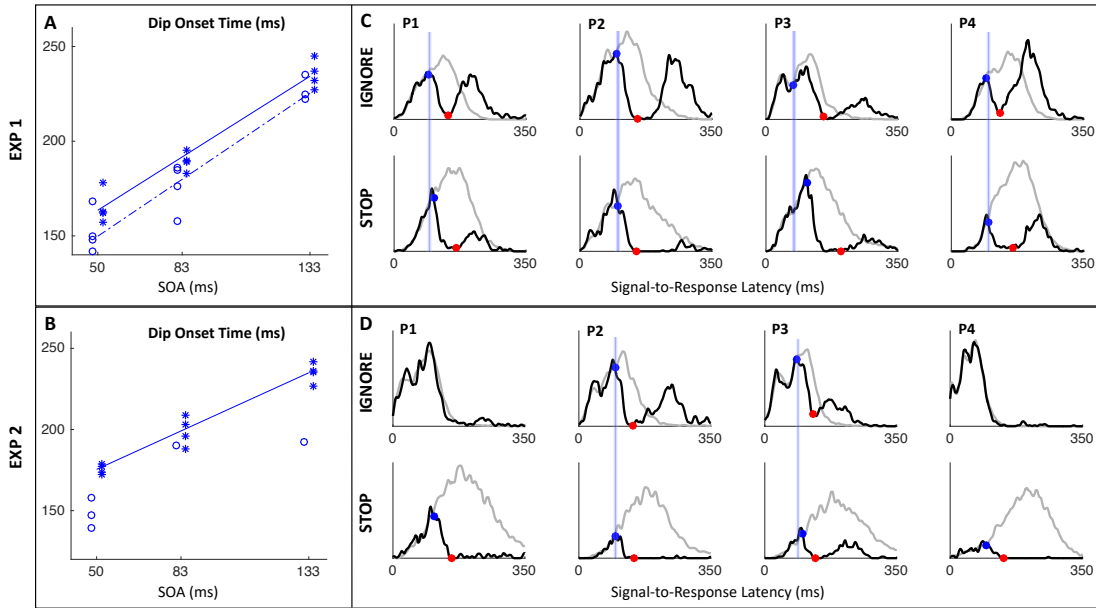

1

2 **Figure 8. A-B.** Dip onset times ( $T_0$ ) for each participant in the IGNORE (open circles)  
 3 (stars) contexts of both experiments, along with regression lines across SOAs on each group  
 4 (whenever sufficient data was available). As predicted, dip onsets are locked on signal onset  
 5 and are temporally aligned between the IGNORE and STOP contexts, consistently across  
 6 experiments. **C-D.** Overlap of dip timing between the IGNORE and STOP contexts in both  
 7 experiments, highlighted by blue vertical bars. Distributions show saccade latency locked on  
 8 signal onset, allowing pooling of trials across the three SOAs to best visualize the timing of dip  
 9 onset (blue dots) and maximum (red).

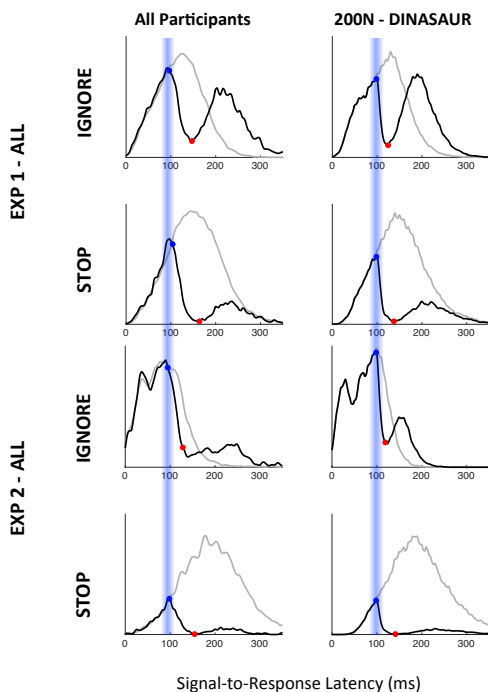

10 **Figure 9.** Distributions of RT locked on signal onset, pooled across all SOAs and observers, along  
 11 with simulations using 200N-DINASAUR model (parameters from Table 5). Same conventions  
 12 as Figure 8.



1           Although dip onsets were overall aligned across tasks in both experiments, there  
2 appeared to be small but systematic numerical differences, suggesting  $T_0$  may be delayed in  
3 the STOP condition. This is investigated below.

4           *Group statistics.* In Experiment 1, we found a main effect of SOA on  $T_0$  in a 2 (task) x 3  
5 (SOA) ANOVA,  $F(2,6) = 84$ ,  $p < 0.001$ . The main effect of task was not significant ( $F(1,3) = 3.6$ ,  $p$   
6  $= 0.15$ ) and did not interact with SOA ( $F(2,6) = 0.37$ ,  $p = 0.71$ ) in line with our main hypothesis.  
7 Bayesian statistics suggested a similar pattern, with a Bayes Factor for the main effect of Task  
8 of 0.63 (using equal prior probabilities). The same statistical test could not be conducted on  
9 Experiment 2 alone because there were too many conditions without dipoles. Pooling the data  
10 across Experiment 1 and 2 showed similar results (evidence for a role of Task: BF = 0.5). BFs for  
11 Task were below 1 (therefore favoring the null) but above 0.33 (therefore not providing clear  
12 evidence in favor of the null either). Based on these, we cannot exclude that dip onset may be  
13 slightly delayed in the STOP context compared with the IGNORE, but this delay is small (5 ms  
14 on average when pooling across participants, SOAs and both experiments).

15           *Bootstrapping within the pooled RT distributions.* Considering that our number of  
16 participants is small but our number of trials per participant is very high, a complementary  
17 statistical approach to the group-statistics above is to use bootstrapping to estimate the  
18 stability in estimated dip onset times observed across the two tasks. This was first performed  
19 on the signal-to-respond latency (same as Figure 9), i.e. on RT locked on distractor onset,  
20 pooled across all participants and SOA. For each experiment, task (IGNORE and STOP) and  
21 condition (no-signal and signal), we generated 1000 surrogate distributions from the observed  
22 distributions, by randomly sampling the same number of trials from each original distribution.  
23 We then applied the same dip onset extraction procedure as for observed data and calculated  
24 the median and 95% (uncorrected percentile) confidence intervals for the 1000  $T_{op}$ . The  
25 median  $T_{op}$  were smaller in the IGNORE condition compared with the STOP condition but the  
26 confidence intervals largely overlapped across the two conditions (median [lower, upper]  
27 were: 96 [86, 103] and 103 [100, 106] for the IGNORE and STOP conditions of Exp 1; 96 [69,  
28 104] and 99 [86, 103] for Exp 2). The same conclusion was reached when repeating this  
29 analysis on each individual separately. The small difference between IGNORE and STOP  
30 conditions was therefore deemed too inconsistent and will be ignored in our modelling, but  
31 we return to plausible explanations for it (if real) in Discussion.

32           Note that since the baseline distributions differed depending on context, but the timing of  
33 the dips (relative to the signal) is similar across contexts, the dip is therefore earlier *relative*  
34 to the main mode of the distribution in the STOP context, and thus the height of the pre-dip  
35 distribution was normally smaller in the STOP context. This is just a consequence of the  
36 baseline distributions. The critical question here was whether the leading edges of the dips are  
37 coincident.

38           Figure 8 and Figures S1 and S2 in Appendix show that, for all participants in Experiment 1  
39 and P3 in Experiment 2, there is a partial recovery from the dip even in the STOP context. This  
40 failure to inhibit the saccade well after the time when they are usually able to do so has been  
41 reported before (Akerfelt et al., 2006). We suggest it may indicate occasional failure to trigger  
42 the inhibition command (Skippen et al., 2018), possibly fuelled by confusion about which  
43 instruction applied (see section 5.3).

44  
45

## 1 5. Modeling Results

2 This section details the steps taken to adjust three of the parameters in the DINASAUR model  
 3 and to introduce a new one, in order to match the empirical data from Experiment 1 and 2  
 4 above. These adjustments are summarized in **Table 5** below and concern:

- 5 - The visual delay (directly inferred from dip onset in the IGNORE context, section 5.1)
- 6 - The strength of endogenous signals during fixation and in response to the target  
 7 (constrained solely from the NO-SIGNAL trials in each context, reflecting strategic  
 8 preparatory settings, section 5.2)
- 9 - A new parameter quantifying a participant’s occasional failure to apply the STOP  
 10 instruction, possibly because of lapses or confusion, which we will refer to as C  
 11 (section 5.3)

12 **Table 5.** Parameters adjusted in 200N-DINASAUR to capture data from Experiments 1 and 2  
 13 (see Table 2 for full list of parameters). Grey boxes indicate parameter values from Bompas &  
 14 Sumner (2011) or those directly set by stimulus location or from another parameter. White  
 15 boxes indicate free parameters used to capture the IGNORE and STOP contexts of Experiments  
 16 1 and 2. Among these,  $\delta_{vis}$  is directly constrained by behavioral dip onset in SIGNAL-IGNORE  
 17 trials ( $\delta_{vis} = T_0 - \delta_{out}$ ),  $a_{endo-fix}$  and  $a_{endo-targ}$  are adjusted only from the NO SIGNAL condition in  
 18 each context and assumed to generalize to the respective SIGNAL conditions, while C is the only  
 19 new parameter freely adjusted when generalizing to the STOP context (see text in section 5.3  
 20 for details).

| Name            | Description                                | Bompas & Sumner<br>(2011) | Experiment 1              |      | Experiment 2 |      |
|-----------------|--------------------------------------------|---------------------------|---------------------------|------|--------------|------|
|                 |                                            |                           | IGNORE                    | STOP | IGNORE       | STOP |
| $ECC_{Dist}$    | Distractor eccentricity in SC (mm)         | -1.76                     | 0                         |      |              |      |
| $ECC_{Targ}$    | Target eccentricity in SC (mm)             | 1.76                      | 2.25                      |      |              |      |
| $\delta_{vis}$  | Visual delay (ms)                          | 50                        | 83                        |      |              |      |
| $\delta_{endo}$ | Endogenous delay (ms)                      | 75                        | $\delta_{vis} + 25 = 108$ |      |              |      |
| $a_{endo-fix}$  | Amplitude of endogenous inputs at fixation | 10                        | 18                        | 22   | 12           | 54   |
| $a_{endo-targ}$ | Amplitude of endogenous inputs to target   | 14                        | 16                        | 14   | 19.5         | 13   |
| C               | Confusion (see section 5.3)                |                           |                           | 0.20 |              | 0.05 |

21

### 22 5.1. Non-decision time

23 In previous work, we have explained why and illustrated how sensory conduction times for  
 24 visual signals can be directly estimated from dip onset time (Bompas et al., 2017; Bompas &  
 25 Sumner, 2011). Providing  $\delta_{vis}$  and  $\delta_{out}$  are constant across trials and a large number of trials are  
 26 available,  $T_0 = SOA + \delta_{vis} + \delta_{out}$ . This is because the earliest effect a visual stimulus can have on  
 27 a saccade RT distribution represents the case where a distractor signal arrives ( $SOA + \delta_{vis}$  after  
 28 target onset) at the selection system just before the decision threshold is reached by the  
 29 target activity ( $\delta_{out}$  before the response would have occurred).

30 In the data presented in Section 4, we observed that  $T_0$  hardly changes across contexts and  
 31 experiments, despite the large differences in mean RT observed across blocks. Although  
 32 within-participant bootstrapping analyses suggested mean estimates for dip onsets were

1 systematically earlier under the IGNORE instruction, the differences were only small (5 ms on  
2 average on pooled data across subjects and experiments). Furthermore, group statistics failed  
3 to reveal a main effect of Task on  $T_0$ . We therefore choose to ignore this small difference in the  
4 present modeling (taking it into account would have altered the following section only very  
5 marginally; see Discussion for expansion on simplifications in the model). Based on pooled  
6 data across SOAs and observers (see section 4.2), we aimed to produce a  $T_{Op}$  of 98 ms in our  
7 simulations across both contexts and experiments. Using 20 ms for output time (consistent  
8 with previous work) and a similar smoothing as in observed data (which anticipates dips by 5  
9 ms) directly led us to adjust  $\delta_{vis}$  to 83 ms. For simplicity, we assume that  $\delta_{vis}$  is equal for targets  
10 and distractors (this is a simplification as they have different eccentricity and sizes).

11 By keeping  $\delta_{vis}$  constant across instructions and experiments, we imply that  $\delta_{vis}$  in  
12 DINASAUR does not contribute to pro-active slowing. This is consistent with the fact that  
13 DINASAUR nodes are mimicking the behavior of visuo-movement neurons (or “build-up”  
14 neurons in SC), rather than movement neurons. Indeed, recordings in visuo-movement FEF  
15 and SC neurons of monkeys performing a visual search task under a speed or accuracy  
16 condition (Reppert, Servant, Heitz, & Schall, 2018) (see also Heitz & Schall, 2012)  
17 unambiguously show that non-decision time of the visual response is unaffected by strategic  
18 adjustments. Under the accuracy condition, neurons from both populations showed a  
19 decrease in baseline firing rate (before target onset) as well as a lengthening of selective drives  
20 able to distinguish targets from distractors, but no change in visual gain or sensory conduction  
21 delay. In contrast, movement neurons in FEF and SC do delay the onset of their response on  
22 trials following stop-signals compared with trials following go-trials, consistent with behavioral  
23 slowing between these two conditions (Pouget et al., 2011), and with the idea that movement  
24 neurons integrate the output from visuo-movement neurons.

25

## 26 **5.2. Baseline parameters from NO-SIGNAL trials**

27 The next step was to adjust as few parameters as possible to account for strategic adjustments  
28 across tasks (which are inevitably present, but not of direct interest here). When IGNORE and  
29 STOP instructions are delivered in different blocks, such as in Experiment 2, participants adjust  
30 their behavior overall, leading to slower RT in the STOP block irrespective of signal presence  
31 (see section 3.1). This proactive slowing is present to a smaller degree in Experiment 1 when  
32 stop trials were always present but differed in frequency between blocks. To allow a fair test  
33 of the model’s ability to generalize from distraction to countermanding, it is essential to fit the  
34 different latency distributions of the baseline conditions. Critically, we adjusted the model  
35 parameters solely based on NO-SIGNAL trials.

36 It is common to assume that pro-active slowing would be best captured by changes in  
37 initiation threshold (Bogacz, Wagenmakers, Forstmann, & Nieuwenhuis, 2010; Forstmann et  
38 al., 2010; Ratcliff & McKoon, 2008). This is indeed what simple models such as the  
39 independent race model would suggest (Heitz & Schall, 2012; Verbruggen & Logan, 2009).  
40 However, this assumption is not confirmed by electrophysiological recordings from monkeys  
41 (Heitz & Schall, 2012; Pouget et al., 2011; Reppert et al., 2018). Specifically, in SC neurons,  
42 firing rates some 10-20 ms prior to saccade initiation (i.e. the threshold) were the same under  
43 a speed and accuracy conditions (Reppert et al., 2018). Similarly, no change in threshold was  
44 observed after stop-signal trials, another way in which pro-active slowing has been  
45 investigated (Pouget et al., 2011). In FEF neurons, firing rates were actually *higher* in the speed  
46 condition compared with the accuracy condition, in direct contradiction to the decrease in

1 threshold suggested by the fit from the independent race model on concurrent behavioral  
2 data from these monkeys (Heitz & Schall, 2012). In contrast, both SC and FEF visuo-motor  
3 neurons consistently showed modulation in baseline firing rate (before target onset), as well  
4 as delayed target selection time (Reppert et al., 2018).

5 In the DINASAUR model, baseline firing is directly related to the strength of endogenous  
6 fixation drive during the fixation period ( $a_{endo\_fix}$ ), while delayed target selection would be  
7 caused by reducing the strength of the endogenous drive to the target ( $a_{endo\_targ}$ ). Indeed,  
8 stronger fixation drive in stop task would, via lateral inhibition, reduce baseline firing rate in all  
9 peripheral nodes, making it more difficult to produce fast but possibly erroneous saccades to  
10 the target. Similarly, RT to the target largely relies on endogenous drives, since exogenous  
11 drives are most of the time insufficient to reach the threshold. Therefore, decreasing  $a_{endo\_targ}$   
12 directly slows down most responses.

13 Last, in SC visuo-motor neurons, changes from fast to accurate instructions were not  
14 accompanied by a modulation in visual gain (Reppert et al., 2018, i.e. the intensity of the visual  
15 response to stimulus onset that would be identical for targets and distractors). In our model,  
16 this suggests that the strength of visual signals ( $a_{exo}$ ) is unaffected by instructions (as was the  
17 delay of exogenous signals, see section 5.1). As for all the other parameters in the model, in  
18 the absence of specific hypothesis for why they may differ 1) across instructions or 2)  
19 compared with previous work, we refrained from altering these, providing the strictest test of  
20 our model.

21 We therefore varied  $a_{endo\_fix}$  and  $a_{endo\_targ}$  systematically to search for the most suitable pairs  
22 for each of our four baseline conditions. Four observed distributions (one for each context and  
23 each experiment) were obtained from pooling across the 4 observers after correcting for their  
24 individual differences in mean RT. These were compared with 1000 trials simulated using each  
25 parameter combination, scaled to match the trial number from each experimental condition.  
26 **Figure 10** shows the result of our parameter estimation, based on minimizing the  $X^2$  distance  
27 between observed and simulated NO-SIGNAL RT distributions in each context and experiment.  
28 To increase the sensitivity to the exact shape of the whole RT distribution, we used a fixed bin  
29 size (3.33 ms, the same as for the distributions throughout the article with the same  
30 smoothing) rather than a small number of quantiles. This choice led us to use the mean over  
31 two complementary estimates,  $X^2_{data}$  and  $X^2_{model}$ . Within each bin,  $X^2_{data} = (N_{data} - N_{model})^2 / N_{data}$ ,  
32 with  $N$  denoting the number of saccades for which RT fell within this bin, while  $X^2_{model} = (N_{data} -$   
33  $N_{model})^2 / N_{model}$ . This mean estimate therefore penalizes simulations producing saccades in bins  
34 where none are observed, as well as simulations failing to produce saccades in bins where  
35 some are observed. The overall  $X^2$  was the sum of the  $X^2$  over all the bins where  $N_{data}$  (or  $N_{model}$ )  
36 was at least 1. Although this approach was the most intuitive to us, we note that using either  
37  $X^2_{data}$ ,  $X^2_{model}$  or  $X^2_{model}$  on 10 quantiles actually made very little difference to the fit and no  
38 difference to our conclusion.

39 The parameter adjustments required turn out exactly as predicted by the neuronal  
40 recordings (Reppert et al., 2018) for both experiments. In Experiment 1, the small pro-active  
41 strategic adjustment observers made between the IGNORE and STOP contexts is well captured  
42 by a small increase in endogenous fixation strength and a small decrease in endogenous target  
43 strength (black circle and diamond on Figure 10). In Experiment 2, the same pattern is  
44 observed but the larger pro-active slowing required larger adjustments (blue circle and  
45 diamond).

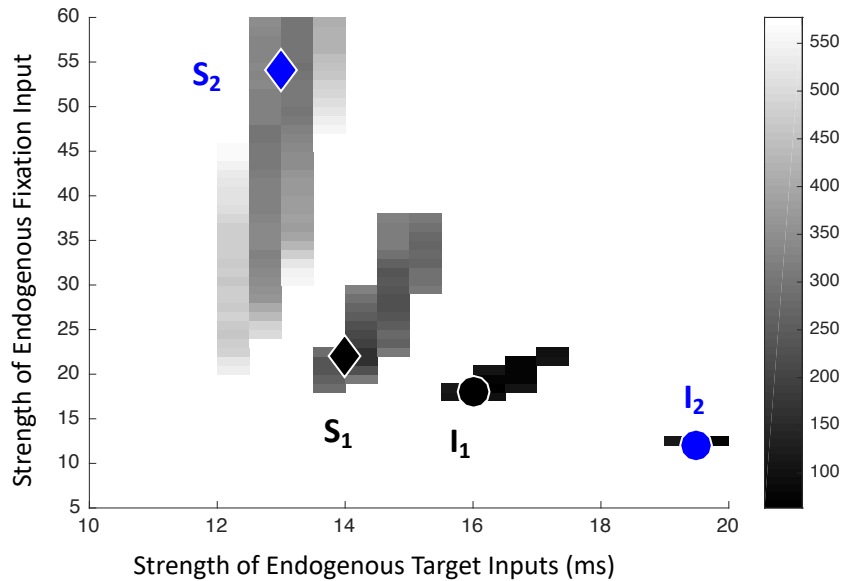

1

2 **Figure 10.** Endogenous parameter changes to account for proactive slowing. The diamond and  
 3 circle symbols show the best parameter pairs (IGNORE-EXP1 is marked as I1, black circle; STOP-  
 4 EXP1: S1, black diamond; IGNORE-EXP2: I2, blue circle; STOP-EXP2: S2, blue diamond). We used  
 5 only the NO-SIGNAL trials and adjusted only the strength of endogenous signals to fixation and  
 6 target in 200N-DINASAUR, to account for pro-active slowing. The 4 symbols indicate those  
 7 parameter pairs minimizing the  $X^2$  distance between simulated and observed RT distributions.  
 8 The grey-scale areas around each symbol illustrate how the goodness of fit varies around the  
 9 best values. These are thresholded to only show  $X^2$  values less than twice the minimum  $X^2$  in  
 10 each condition. The selected parameters were used in Figures 7, 9 and 11 and are listed in  
 11 Table 5.

12

### 13 **5.3. Generalization to SIGNAL-IGNORE and SIGNAL-STOP trials**

14 Crucially, once the adjustments to the NO-SIGNAL trials were made, we could test the ability of  
 15 the model to generalize to the SIGNAL conditions for each SOA (note that our parameters  
 16 were never allowed to differ between SOAs). The model was able to produce the expected  
 17 dips from the IGNORE condition across all SOAs, producing an exquisite match to observed  
 18 data without further adjustments (Figures 7 and 9B).

19 The critical step was then to test how well behavior on SIGNAL-STOP trials could be  
 20 predicted from our model under the following assumptions: i) the automatic exogenous  
 21 activation should be identical to the IGNORE context (in both amplitude and delay); ii) all  
 22 endogenous events occur with identical delay following their respective visual triggers; iii) this  
 23 single endogenous delay variable is not free, but fully constrained by the automatic signal  
 24 delay ( $\delta_{endo} = \delta_{vis} + 25$  ms). We assess the model against both the shape of the RT distributions  
 25 (Figures 7, S1 and S2) and also typical measures related to the stop-signal task (**Figure 11**).

26 At first, we did not introduce any new parameter between the IGNORE and STOP contexts  
 27 (Figure 9B). Like in Figure 3, this first attempt was able to produce the overall pattern of the  
 28 stop condition producing very similar effects as the state of the art model for saccadic  
 29 countermanding, Blocked Input 2.0. However, similar to Blocked Input models (Figure 3C) but  
 30 in contrast to observed data, there were no “late” errors: the small recovery from the dip  
 31 observed in all the participants in Experiment 1 and one in Experiment 2 was absent (see

1 Figures 1 and 2 in Appendix). As a result, the inhibition function (the proportion of failed stops  
2 as a function of SOA, dashed lines on **Figure 11A**) was systematically underestimated. Second,  
3 again similar to Blocked Input 2.0, DINASAUR predicted stop-signal reaction time (SSRT) to  
4 remain constant across SOAs (dashed lines on **Figure 11B**), in contrast to observed data  
5 showing a consistent decrease as a function of SOA in both experiments (dotted thin lines on  
6 Figure 11B).

7 This dependency of SSRT over the stop-signal delay has been reported in the manual  
8 (Band, van der Molen, & Logan, 2003; de Jong, Coles, Logan, & Gratton, 1990; Logan & Burkell,  
9 1986; Logan & Cowan, 1984; Matzke, Love, & Heathcote, 2017) and saccadic (Hanes & Schall,  
10 1995) domains before. Within the framework of the independent race model, it can be  
11 explained by assuming the *true* SSRT varies across trials, and that varying the SOA leads to  
12 differently sampling this underlying distribution (Logan & Cowan, 1984). Since at short SOAs,  
13 most responses are successfully inhibited, the estimated SSRT is close to the true mean of  
14 SSRT. However, at long SOAs, only the shortest SSRT lead to successful inhibition, therefore  
15 leading to a systematic underestimation of the mean SSRT. However, a more fruitful  
16 interpretation seems to be in terms of failure to trigger the stop instruction, which would  
17 occur on some proportion of trials (Band et al., 2003).

18 In the framework of the DINASAUR model, the same idea (variability of stop drive across  
19 trials) can be implemented in a simple way by adding a “confusion” (or inattention) parameter,  
20 i.e. a random proportion of trials where the STOP instruction is forgotten and which are  
21 therefore treated as IGNORE trials. This refinement is conceptually similar to that proposed in  
22 Hanes & Carpenter (1999), but is now explicitly linked to the ignore condition, which the  
23 system defaults to when the instruction to stop occasionally fails to be implemented. It is also  
24 well in line with similar suggestions made in the more cognitive domain and using manual  
25 responses (Band et al., 2003; Matzke et al., 2017; Skippen et al., 2018). In DINASAUR, top-  
26 down drives are either on or off while, realistically, their strength and delay may well vary  
27 across trials. One could envisage that, on some trials, the blocking occurs but is incomplete or  
28 occurs too late, leading to the saccade being triggered anyway. These cases would be difficult  
29 to distinguish from a complete failure to apply the instruction to stop, and are therefore also  
30 captured by our confusion parameter.

31 This adjustment allowed late recovery from stop-signals, and also improved the match to  
32 the inhibition function (continuous lines on Figure 11A), allowing more errors to be made by  
33 the model, bringing it more in line with human participants. This confusion parameter was set  
34 to 20% and 5% in Experiments 1 and 2, respectively, for the purpose of Figure 7, 9 and 11, but  
35 no further attempt was made to formally fit this proportion, as we expect it’s exact value to be  
36 highly dependent on participants, exact instructions and proportions of stop trials. Although  
37 20% may seem high, we note that it is well in line with estimates from very recent work,  
38 suggesting an average value of 17%, though on a very different task (Skippen et al., 2018).  
39 Crucially, although this confusion parameter is constant across SOA (like all other parameters),  
40 the proportion of saccades eligible for recovery decreases as SOA increases, and this now  
41 makes our model successfully capture the dependency of SSRT on SOAs (continuous lines on  
42 Figure 11B).

43 We also plotted the cumulative distributions of RT (**Figure 11C**). Contrary to the custom in  
44 the stop-signal task literature, we did not normalize these on the number of saccades  
45 executed, which, in our eyes, would have masked the main feature of interest here: the  
46 exquisite overlap in the signal and no-signal distributions until the departure point ( $T_0$ ) and the  
47 dependency of this point on the SOA, both hallmarks of dips in the saccadic inhibition

1 literature. Our model captured the observed behavior well, irrespective of how the data was  
 2 plotted.

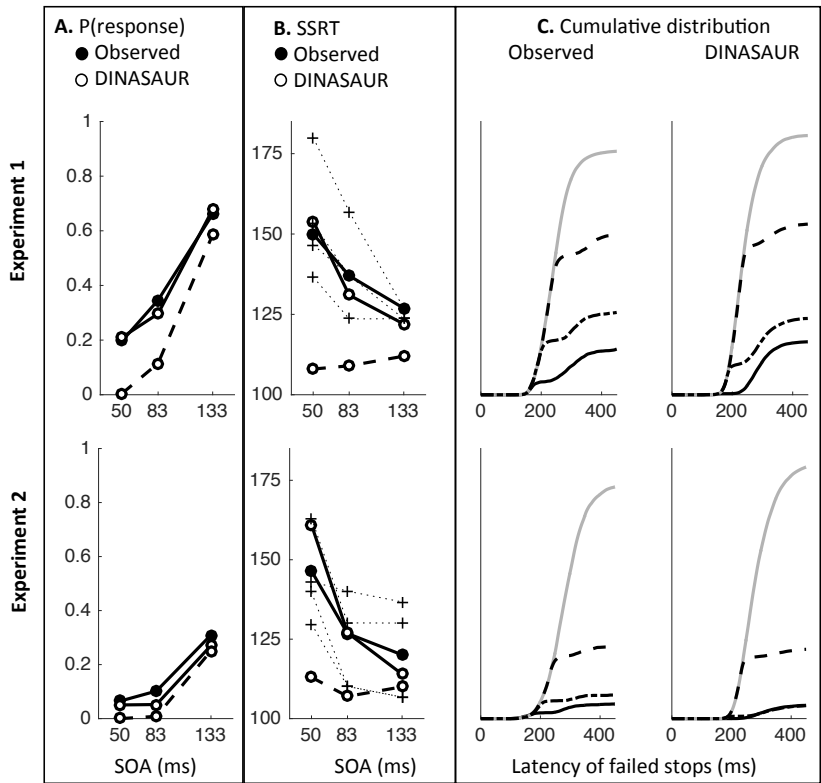

3  
 4 **Figure 11.** Traditional stop signal task measures from observed and simulated data. **A-B.**  
 5 Proportion of failed stops (A) and stop signal reaction time (SSRT, B) across SOAs, from the  
 6 pooled data across observers (black dots) and in DINASAUR simulations (empty circles) with  
 7 and without confusion (continuous and dashed lines). The SSRT was calculated using the  
 8 integration method (Verbruggen et al., 2013) and is also shown for each observer separately (+  
 9 and dotted lines). **C.** Cumulative distribution for no-signal (light grey) and signal trials (black  
 10 continuous, semi-dashed and dashed for SOA 50, 83 and 133 respectively).

11

## 12 6. Discussion

### 13 **How do brains halt action plans? Intertwined influences of automatic and top-down** 14 **processes**

15 The thesis exposed in the present article is that the functional outcome of top-down control  
 16 occurs initially via automatic indiscriminate mechanisms, which are followed by goal directed  
 17 processes in the traditional view. When halting an action plan following new information in the  
 18 world, the first process is a rapid automatic interference from the new sensory signal itself –  
 19 which occurs regardless of the goal to halt. This indiscriminate interference has dynamics  
 20 arising from the transient nature of rapid visual signals (such as the magnocellular pathway)  
 21 and lateral inhibition in motor decision areas. It results in slowing down the process that leads  
 22 to action, temporarily interrupting it. The endogenous command to alter the on-going action  
 23 plan can then piggy-back on the already-unfolding automatic interruption. This account offers  
 24 a simple interpretation for a wealth of data showing how “low-level” factors affect our ability  
 25 to stop. It also allows quantitative predictions for many other factors, which have been shown

1 to automatically interfere with speeded responses but may not have been studied in the  
2 context of countermanding (see “Empirical predictions and future directions” below).

3 This is not to say that rapid interference is entirely goalless in the broader sense: our  
4 brains may allow this interference to happen because it is helpful on average. In other words,  
5 natural selection seems to have preserved some apparently very basic – and probably  
6 phylogenetically old – processes that allow new and often irrelevant sensory information to  
7 rapidly travel to motor decision areas and influence action choices within 100 ms. We envisage  
8 this as one of the initial building blocks for how flexible behavior becomes possible as brains  
9 develop additional pathways that are more selective but slower. Further, while in simple visual  
10 scenes (such as in these experiments) all new stimuli may provide indiscriminate interference,  
11 in complex everyday scenes the degree of rapid interruption is likely to be modulated by  
12 relevance to on-going tasks (‘attention’ or ‘task-set’). It is known that attention modulates  
13 sensory signals from the earliest stages of processing (as early as the lateral geniculate nucleus  
14 for visual signals, O’Connor, Fukui, Pinsk, & Kastner, 2002). Similarly, sub-conscious motor  
15 priming is highly conditional on task-set (current task goals; i.e. whether the priming stimuli  
16 have a current motor mapping or not), suggesting automatic flows of activity through the brain  
17 show *conditional* automaticity (see Kunde et al., 2003 for an in-depth discussion on this topic)  
18 – and hence are not entirely goal-free. This dependency of automatic drives on task-set is also  
19 illustrated in pro-active control (Verbruggen, Best, et al., 2014; Verbruggen, Stevens, &  
20 Chambers, 2014). Therefore, although the present article develops the idea that top-down  
21 processes piggy back on automatic ones, we see it as complementary to the literature showing  
22 that automatic processes often piggy-back on top-down processes, pointing towards a close  
23 intertwining of automatic and volitional drives (Boy, Husain, & Sumner, 2010; Sumner &  
24 Husain, 2008).

25 Our conclusions are convergent with previous literature showing how task goals, such as  
26 stopping, can be influenced by invisible or task-irrelevant primes (see Verbruggen, Best, et al.,  
27 2014 for a review). Our viewpoint is also compatible with other recent theories of  
28 countermanding. Here we investigated the effect of visual stimuli on oculomotor control in  
29 humans, but our conceptualization is in line with other literatures describing animal behavior,  
30 such as freezing, as proposed in the Pause and Cancel model in rodents (Schmidt & Berke,  
31 2017). Our conclusions are reminiscent of those from Bisset & Logan (2014) on selective  
32 stopping paradigms, where participants are asked to stop to some signals but ignore others  
33 within the same session. In this context, it has been suggested that participants use a Stop  
34 then Discriminate strategy, in which they stop indiscriminately whenever a signal occurs and  
35 restart only if the signal is an ignore signal. However, we portray the initial stage as slowing  
36 down rather than stopping, and as an automatic process rather than a strategy.

### 37 38 ***Converging modeling approaches***

39 Once we clearly conceptualized the first process in halting as transient automatic interference,  
40 we found natural alignment between recent models of countermanding and low-level  
41 mechanisms. The early process in countermanding models such as Blocked-Input 2.0 is already  
42 suggestive of automatic signals given its very short delay. The DINASAUR model was previously  
43 used to account for hallmark low-level oculomotor effects such as the gap effect and saccadic  
44 inhibition (Bompas & Sumner, 2011, 2015; Trappenberg et al., 2001), as well as visuo-manual  
45 interference (Bompas et al., 2017). We inherited the logic of blocking input for the  
46 endogenous signal from the most comprehensive model of countermanding (Logan et al.,



1 2015), but we inherited nearly all actual parameters from saccadic inhibition (either previous  
2 work or the baseline and ignore conditions here). Countermanding behavior then drops out of  
3 the model. The model's activity dynamics are also consistent with monkey neurophysiological  
4 data (Boucher, Palmeri, et al., 2007; Hanes et al., 1998) – an important test-bed for previous  
5 models of countermanding (e.g. Logan et al., 2015).

6 To allow a match to every aspect of the data, we made one minor addition: a confusion  
7 parameter to capture the occasional late errors. However, even without this post-hoc addition,  
8 the model was able to generate good predictions in a behavior it had never been constrained  
9 for. Besides, this parameter is new to DINASAUR, but its plausibility has been already well  
10 supported in the context of the stop-task (Band et al., 2003; Matzke et al., 2017; Skippen et al.,  
11 2018). It is worth emphasizing how rare it is for psychological models to capture new behavior  
12 for which they were not designed without being fit directly with plenty of free parameters.  
13 This might have been even more challenging when crossing a conceptual boundary – such as  
14 from bottom-up interference to top-down control. However, our thesis is that this should not  
15 be considered a conceptual boundary. Situations requiring top-down control do not differ  
16 qualitatively from those that stimulate automatic interference and most of the same brain  
17 mechanisms are engaged in both situations. Moreover, although elegant parsimonious  
18 mathematical models designed to capture specific tasks may often struggle to generalize to  
19 other tasks (unless completely re-fit or parameters are added that change the model  
20 characteristics), generalization is more natural in more complex models conceived to mimic a  
21 biological system. Of course, more parameters means more flexibility, should one allow all  
22 these parameters to vary freely. Note though that our approach is the opposite: we keep most  
23 parameters fixed and only allow very few parameters to vary in a highly constrained,  
24 hypothesis-driven manner. The ability of such models to generalize to new behaviors is a great  
25 strength, which, in our eyes, outweighs the loss in parsimony and mathematical elegance.

26 Although our account bears conceptual resemblance to other recently proposed models  
27 of stopping, there remain important implementation differences. Specifically, the Pause then  
28 Cancel model (Schmidt & Berke, 2017) relies on an unspecific increase in the action initiation  
29 threshold following the stop signal event. Similarly, in Aron & Wessel (2017), a temporary  
30 slowing can be triggered in response to any unexpected events. Both accounts suggest this  
31 indiscriminate response could be mediated by the Basal Ganglia (BG), which has inhibitory  
32 connections with the SC. In contrast, DINASAUR mimics topologic relations between the visual  
33 field and the direction of saccades, as is commonly seen in SC buildup neurons during visually-  
34 driven saccades. This difference in implementation could arise from a focus on different animal  
35 species and therefore on different types of action (ballistic head movements in rodents and  
36 saccades in monkeys). However, both BG and SC are involved in both actions in both species  
37 and it is therefore likely that both should contribute to stopping behaviors, the former as a  
38 general freezing mechanism and the later as a more spatially specific mechanism able to  
39 resolve competition across multiple stimuli in the visual field. Although simplified and limited,  
40 the spatial extent of the DINASAUR model allows us to test future predictions related to the  
41 spatial specificity of stopping behavior (see “Empirical predictions and future directions”  
42 below). Future research investigating this spatial specificity could cast light on the relative  
43 contribution of the Basal Ganglia (possibly less spatially specific) and the Superior Colliculus  
44 into saccade countermanding.

45 Another possibly important implementation difference relates to the distinction between  
46 visuomovement and movement neurons. DINASAUR units are simplified visuomovement SC  
47 neurons. As a result, they will show an automatic transient visual response, followed by a  
48 buildup of activity when the task requires it. In contrast, units in models such as Blocked Input

1 2.0 are thought to reflect FEF movement neurons. This means that they will not show the  
2 automatic visual response, but only the task-related accumulation. It has been argued that  
3 only movement (and not visuomovement) neurons reflect the accumulation of evidence that  
4 leads to saccadic decision (Ray et al., 2009). The fact that movement neurons (but not  
5 visuomovement neurons) showed activity profiles that matched those expected of GO units in  
6 a race model contributed to this assumption. Reciprocally, the presence of neurons with  
7 activity resembling the hypothetical GO units also contributed to legitimize the race model.

8 Counter to this prevailing view, it is precisely the visuomovement nature of DINASAUR  
9 units (their automatic response to visual stimuli as well as their strategic drives) that allows  
10 DINASAUR to flexibly capture tasks it was not originally designed for – the saccadic inhibition  
11 and countermanding tasks – as well as several hallmarks of visuo-oculomotor behavior.  
12 Similarly, our upgrade of Blocked Input 2.0 to Blocked Input 3.1 consisted precisely in turning  
13 units from movement neurons into visuomovement neurons. The fact that neurons exist that  
14 behave in a similar way to units in our model is a necessary condition for this model to be  
15 “biologically plausible” but surely does not prove the model is right, nor that these neurons  
16 are precisely the ones “taking the decision”. Although it is essential to simplify complex  
17 behaviors and concepts into workable models, we keep in mind that this simplification makes  
18 all computational models intrinsically wrong. Ultimately, the proposed framework offers the  
19 opportunity to generate precise quantitative predictions, which can then be tested empirically  
20 (see “Empirical predictions and future directions” below). The endeavor here is not to  
21 “validate” one particular model or show it outperforms other models in specific tasks, but  
22 rather to employ a precise framework to bridge gaps across paradigms and literatures.

### 24 ***Model simplifications***

25 Our approach to minimize the number of free parameters in the model led to four main  
26 simplifying assumptions (beyond the fact that all models are simpler than neuronal processes).  
27 First, most parameters were inherited from previous work, including the spatial profile of  
28 excitation and inhibition, the spatial extent of excitation from visual onsets and the temporal  
29 profile of exogenous signals. These parameters were based on monkey neurophysiology  
30 (Trappenberg et al., 2001), and appear sufficient for simulating currently existing human  
31 datasets (present and past, see Bompas & Sumner 2011).

32 Second, we assumed visual onsets triggered the same automatic response (delay and  
33 amplitude), irrespective of their eccentricity. Visual eccentricity is known to decrease  
34 sensitivity and acuity, which could, in the model, mean weaker and slower signals. On the  
35 other hand, oculomotor behavior is, by definition, designed to orient towards peripheral  
36 stimuli, which may therefore be prioritized in oculomotor planning. To fully compare  
37 conduction delays ( $T_0$ ) across eccentricity is beyond the current data, but a proxy can be  
38 obtained from the very quickest saccades that are not guesses (i.e. the shortest-latency in  
39 which there are more correct than error saccades). In our data, this latency was 106 ms, and  
40 occurred in the condition expected to have lowest engagement with fixation: the IGNORE  
41 condition of Experiment 2. This suggests that  $T_0$  for these peripheral stimuli would have been  
42 approximately 100ms, allowing for a minimum amount of decision time and a slight pooling  
43 delay needed to detect above chance performance. This proxy estimate is similar to our  
44 estimate for  $T_0$  at fixation (98ms), and suggests our simplifying assumption of equal latency  
45 was sound.

1 Third, we assumed that instructions (task sets) do not affect the delay and strength of  
2 automatic signals. This is known to be simplistic, as discussed in the second paragraph of  
3 Discussion above. Thus, the small (~5ms) numerical difference in the estimates of  $T_o$  under  
4 IGNORE and STOP instructions could plausibly be a genuine indication of slight top-down  
5 modulation (rather than an outcome of noise in dip onset estimation, which close examination  
6 of Figure 8 reveals is also plausible). One possible interpretation is that proactive slowing in  
7 the STOP condition affects non-decision time as well as enhancing fixation activity.

8 Fourth, we assumed that all endogenous delays were equal, including fixation release,  
9 saccade planning and blocking. This assumption followed from our theoretical view that the  
10 pattern of countermanding behavior could be predicted from lower-level oculomotor  
11 behaviors without separately fitting a special inhibitory or blocking mechanism. It is of course  
12 possible that these delays may differ slightly, in a way that relates interestingly to task-set or  
13 individual differences.

#### 14 15 ***How fast are top-down commands?***

16 The traditional purpose of countermanding research is to understand and measure how  
17 rapidly a top-down signal can overturn an action plan, quantified by the SSRT. One of the  
18 implications of the close relationship between bottom-up and top-down processes that we  
19 envisage is that the effective speed of top down signals depends on bottom-up factors. This  
20 conclusion is actually consistent with a wealth of research showing that SSRT depends on the  
21 exact experimental condition, and we provide here a general framework for explaining this. In  
22 this framework, all top-down drives, including stopping, are about translating sensory  
23 information into task-related action outcomes. Therefore, the speed of top-down drives will  
24 heavily depend on non-decision time, i.e. sensory conduction time and motor output time,  
25 which will depend on the nature of sensory information and action modalities under  
26 investigation.

27 This being said, within the context of one task, one can usefully discuss the speed of top-  
28 down drives associated with a given sensory signal, action domain and instruction set. One  
29 potential implication of conceptualizing the first phase of halting as automatic is that the truly  
30 endogenous signal does not have to be so rapid. This point echoes that of the Pause-then-  
31 Cancel theory of basal ganglia mechanisms (Schmidt & Berke, 2017), where it is argued that a  
32 fast pause mechanism is followed by a cancel process that extends well beyond the traditional  
33 SSRT, and therefore we may have been looking in the wrong temporal window for neural  
34 evidence of such mechanisms.

35 However, in our present results the latency remains relatively short for the top-down  
36 signals. SSRT is normally estimated as between 100 and 150 ms in humans for saccades  
37 (Campbell, Chambers, Allen, Hedge, & Sumner, 2017; Hanes & Carpenter, 1999). In our model  
38 there are two relevant input delays: visual and endogenous delay. For comparison with SSRT,  
39 we need to add motor output time, in this case 20 ms, because SSRT is a measure of the time  
40 needed between a stop signal and when a response would otherwise have *occurred*, not just  
41 the time before the inhibition signal reaches motor maps. The two delays in the model are  
42 therefore 83+20ms (i.e. dip onset time plus the effect of smoothing) for the transient  
43 automatic signal to start interfering with saccade build-up activity, and 108+20ms for  
44 endogenous support to switch back to fixation. One could therefore conclude that the new  
45 conceptualization overall supports previous estimates for the window of inhibitory signals.

1           Importantly though, neither of these two delays in DINASAUR can be interpreted as  
2 reflecting the timing of inhibition *per se*. Indeed, the first is the delay of automatic excitatory  
3 signals. When these automatic signals project to fixation neurons, they have an inhibitory  
4 effect on the plan to move the eyes to the target, but only indirectly, via lateral inhibition. The  
5 second only indexes the *start* of the endogenous switch, while the inhibition disrupting the link  
6 between the visual stimulus and the intention to saccade needs to be sustained throughout a  
7 long period to prevent saccades from recovering from the dip. Besides, the timing of this later  
8 drive is not specific to stopping, but is shared with all top-down drives in the model.

9           How stopping is conceptualized also impacts the conceptual ordering of go and stop  
10 command speed. As previously envisaged within the influential independent race model of  
11 countermanding, the go signal always comes first and stop commands always have to *catch up*  
12 to take effect. This would have misled many into thinking that stop commands are on average  
13 faster than go commands. In contrast, in Blocked Input 2.0, the stopping delay ( $D_{control}$ ) is larger  
14 (62 and 90 ms for Monkey A and C) than the delay for producing go saccades ( $D_{move}$ , 44 and  
15 47). In our model the two delays facilitating stops (83 and 108 ms) are identical to those  
16 producing go saccades to the target. How then is it possible for stimuli occurring *after* the  
17 target to trigger a majority of stops if the relevant delay parameters are equal to or longer  
18 than those driving go saccades?

19           The answer is that in an interactive model a go saccade only occurs after an accumulation  
20 process, which takes some amount of time after the signals start getting integrated into this  
21 process. However as soon as a new signal, or a change in signal (e.g. one being turned off),  
22 reaches that process it can immediately change the accumulation, potentially stopping activity  
23 that was about to reach threshold doing so. In other words, go response latency depends on  
24 both the input delays and the accumulation time (plus output time), while inhibition speed  
25 depends mainly on the input delays (plus output time for behavioral evidence of inhibition).  
26 This distinction was of course known to previous researchers using interactive models.  
27 However, it does not appear to be widely discussed that stop processes can be successful and  
28 appear to ‘overtake’ go processes without there having to be neural mechanisms that are  
29 themselves more speedy for inhibition than for initiation of responses.

30           Although Boucher et al. (2007) stress that the stop signal is ‘late and potent’, while we  
31 have referred to rapid transient inhibition, this difference of language merely occurs because  
32 of different starting positions. This signal is rapid when compared with human saccade latency  
33 distributions, or to the later influences of top-down signals. But it is late in the sense that it  
34 accounts for most of measured SSRT. It is potent in both models, in the sense that as soon as  
35 the signals reach the neural maps, lateral inhibition creates a strong impediment to saccade  
36 planning and has an almost immediately measurable effect in the reduction of saccade  
37 likelihood.

### 38 39 ***The importance of sensory pathway dynamics in motor decision.***

40           Our findings confirm the suspicions of Cabel et al. (2000) and Morein-Zamir & Kingstone (2006)  
41 that the stimulus properties (such as salience) often influence task performance by engaging  
42 both automatic and top-down processes. This warns us not to assume that well-known  
43 behavioral effects in tasks associated with higher level processes always measure mechanisms  
44 at that level. The model framework we use provides a natural explanation for the influence of  
45 stimulus properties, which dictates both the timing and amplitude of the automatic dips  
46 (Bompas & Sumner, 2011; Reingold & Stampe, 2002). Likewise there are known differences

1 between SSRT arising from visual and auditory stop signals (Armstrong & Munoz, 2003;  
2 Boucher, Stuphorn, et al., 2007; Cabel et al., 2000; Morein-Zamir & Kingstone, 2006), which  
3 might traditionally be ascribed to the time needed to detect the stop signal before issuing the  
4 countermand, but in the model would also be captured by different dip size and delay.  
5 Auditory signals also produce dips, which happen sooner than following visual stimuli,  
6 although these have only been studied on microsaccades (Rolfs, Kliegl, & Engbert, 2008).

7 Even changes to response modality – saccadic vs manual – which might not intuitively be  
8 associated with different stimulus-driven effects, in fact do affect the balance of drive from  
9 different sensory pathways (Bompas & Sumner, 2008), and thus the delay and amplitude of  
10 stimulus-driven activity (see Bompas et al., 2017 for discussion and demonstration of the  
11 presence of dips in the manual modality). This could be part of the reason why SSRT differs  
12 between modalities (Boucher, Stuphorn, et al., 2007) and possibly also why saccadic and  
13 manual SSRT are differentially susceptible to influences such as alcohol (Campbell et al., 2017).

14 Some task designs (e.g. manual responses with low-salience stop signals) may entail a  
15 sufficiently small automatic effect that explicitly including it in models would not alter  
16 conclusions in any important way. Indeed, the standard horse-race model of countermanding  
17 has been applied successfully to very many studies. However, we should not assume this will  
18 be the case for all manual designs, and we advocate paying close attention to the nature of  
19 stimuli and the non-linear activity they produce. For instance, it is possible for masked no-go  
20 or stop stimuli to slow down responses and slightly increase the rate of missed responses (van  
21 Gaal, Lamme, Fahrenfort, & Ridderinkhof, 2011), suggesting those invisible stimuli can partially  
22 prime activity, even if this would not manifest obviously in latency distributions under ignore  
23 instruction (for example if there was no strong lateral inhibition at the stage this priming  
24 reaches). Therefore top-down inhibition may partially piggyback on automatic processes even  
25 when it is difficult for us to detect this behaviorally.

26

### 27 ***Non-independence of go and stop processes***

28 The fact that RT for failed stops tends to be shorter than mean RT for correct saccades is  
29 typically interpreted as evidence that the go and stop processes are independent. This  
30 concept, known as contextual independence, assumes that the finishing time of the go process  
31 is unaffected by the presence of the stop signal (see Bissett & Logan, 2014 for a recent  
32 explanation). However, Blocked Input and DINASAUR do not adhere to this concept, and yet  
33 the simulated failed stops have much shorter RT than most correct saccades. This  
34 demonstrates that this behavioral pattern is not a strong test for contextual independence; it  
35 is a necessary but not a sufficient condition.

36 Previous work using saccades with visual (Gulberti, Arndt, & Colonius, 2014; Ozyurt,  
37 Colonius, & Arndt, 2003) and tactile (Akerfelt et al., 2006) stop signals show violations of the  
38 independent race predictions, suggesting interaction between go and stop processes  
39 (Colonius & Diederich, 2018). In contrast, it has been claimed that the idea of independence of  
40 the go and stop activity had been validated in neuronal recordings in FEF (Hanes et al., 1998)  
41 and SC (Paré & Hanes, 2003), because there was no difference in saccade-related activity in  
42 failed stops and correct trials when  $RT < SSRT + SOA$ , and no peak velocity or eccentricity  
43 difference in the saccades made (these would be behavioral consequences of any difference in  
44 SC activity). However, we now show that this way of selecting trials is very similar to  $RT < \delta_{vis} +$   
45  $SOA$ , when no influence from the signal is yet measurable. Figure S3 in Appendix offers a clear  
46 demonstration of this. In all models the stop and go signals remain independent while the stop

1 signal is in sensory transmission before it reaches the integration process. The proportion of  
2 failed stops that occur during this time are expected to show contextual independence.

3

#### 4 **What does SSRT reflect?**

5 Simulations using published parameters for Blocked Input 2.0 produced  $T_0$  around 60 ms and  
6 this value maps well onto the sum of excitatory input delay (47) and output time (10), just like  
7 in DINASAUR. Using the standard integration calculation for SSRT (but see Skippen et al.,  
8 2018), the same simulations produce SSRT estimates of 73 ms for Monkey A and 93 ms for  
9 Monkey C (similar to observed SSRT, 71 and 94 ms), irrespective of SOA. These values map  
10 approximately onto the sum of  $D_{Control} + \delta_{out}$  for Monkey A (62 + 10), less clearly so for Monkey  
11 C (90 + 10). However, the proximity may be coincidental, since SSRT is also clearly influenced  
12 by other parameters in the model ( $D_{move}$  and  $D_{fix}$ ), though not in straightforward ways.

13 Our SSRT estimates systematically decrease with increasing SOA, as previously noted in  
14 the countermanding literature. This trend suggests that SSRT does not directly reflect the  
15 timing of some unique underlying parameters of the sensorimotor system, as these would not  
16 be expected to vary with SOA. Linking saccade countermanding to saccadic inhibition and  
17 modeling both tasks with DINASAUR offers a quantitative explanation for this. The SSRT  
18 measure ignores the RT of failed inhibition, and therefore treats late errors equivalently to  
19 early errors. In other words, SSRT reflects the latency of inhibition *as well as* the success of  
20 inhibition. Given that dips are never so sharp that the distribution falls to zero straight after  
21 dip onset, there are always failed stops beyond dip onset. The number of these is influenced  
22 by nearly all parameters in the two models we considered. Therefore, SSRT is always higher  
23 than  $T_0$ , and is a compound measure rather than the reflection of inhibitory delay alone.

24 Many researchers use SSRT to measure individual differences in stopping ability. The  
25 model supplies a conceptually useful distinction that is merged in SSRT: whether better “ability  
26 to stop” translates into quicker/stronger application of top-down control (a longer-lasting dip  
27 as top down control takes over from the automatic inhibition) or more consistent blocking  
28 behavior across trials (fewer late errors/lapses). This is well in line with very recent work,  
29 suggesting correcting SSRT estimates for trigger failure improves correlation with impulsivity  
30 trait (Skippen et al., 2018).

31

#### 32 **Empirical predictions and future directions**

33 Many “low-level” factors, such as signal contrast, chromaticity or position in the visual field,  
34 have been shown to modulate the automatic delaying of saccades. The present framework  
35 therefore predicts that these factors should also impact our ability to stop. Using previous  
36 quantitative estimates for how these factors precisely influence the delay and strength of  
37 exogenous signals, quantitative predictions for accuracy and related measures such as SSRT  
38 can be easily derived from DINASAUR. For instance, we have previously described how  
39 increasing the signal’s contrast equates, in DINASAUR, with increasing the strength and  
40 decreasing the delay of exogenous signals (Bompas & Sumner, 2009, 2011). We have also  
41 described how the interference from signals specifically designed to be visible only to some  
42 chromatic channels (“S-cone stimuli”) compared to that from luminance signals matched in  
43 salience. Using DINASAUR, we suggested that corresponding exogenous signals are delayed by  
44 25 ms, consistent with known electrophysiology (White & Munoz, 2011), but possess equal  
45 strength (Bompas & Sumner, 2008, 2011). Previous research has also shown that stimuli

1 presented in the temporal hemifield, i.e. left (right) visual hemifield when viewed with the left  
2 (right) eye only, interfere more with saccade latency compared with nasal stimuli (Walker,  
3 Mannan, Maurer, Pambakian, & Kennard, 2000). Some of these factors have never been  
4 considered in the context of countermanding, but a clear prediction from our proposal is that  
5 it should also be harder to stop in response to nasal or S-cone stimuli. Conversely, the present  
6 data show that dip onset, which we use to constrain the delay of exogenous inputs, can also be  
7 estimated from the stop signal task. This means that existing stop task datasets could be  
8 reanalyzed using the present framework in order to investigate automatic inhibition.

9 The current DINASAUR model is only 1D and its spatial aspects are still largely under-  
10 constrained (we have not allowed them to vary; they were inspired by recordings in monkeys  
11 but were never systematically tested against human behavior). Nevertheless, the fact that it  
12 possesses such spatial layout contrasts with most decision models (which possess typically 2  
13 nodes), and offers the possibility to investigate the effect of spatial attributes of signals and  
14 targets, such as size and location. For instance, DINASAUR correctly accounts for the fact that  
15 interference can be triggered by visual stimuli appearing at any location in the visual field but  
16 it also predicts that the interference should be modulated by where the stop signal specifically  
17 appears, in relation to the fixation and the saccade target. Previous research has shown that,  
18 in the stop task, signals appearing at the same location as the target were less potent than  
19 contralateral signals (Ozyurt et al., 2003). This is consistent with our previous work showing  
20 such stimuli fail to induce any saccadic inhibition (Bompas & Sumner, 2011), possibly due to  
21 the existence of a refractory period preventing two bursts of visual activity to occur close in  
22 time at the same location. It is therefore possible that these signals do not produce any  
23 automatic interference and act purely via top-down signals, providing an interesting design for  
24 isolating top-down factors.

25 Another prediction from our framework is that factors mainly influencing top-down drives  
26 or the ability to apply these consistently (such as task switching, dual tasking, workload etc)  
27 should affect primarily the ability to stop saccades from recovering after the dips, but not so  
28 much dip onsets. More generally, the influences of clinical conditions, medications or other  
29 individual differences (age, personality traits etc) may well manifest as a combination of  
30 automatic and top-down drives differences. Therefore, disentangling the early (automatic dip)  
31 and late (blocking) stages in saccade countermanding, as the DINASAUR framework offers,  
32 should help revealing more specifically those higher-level factors researchers are often  
33 primarily interested in.

34 So far, we have assumed that the delay of endogenous drives, including blocking, is fully  
35 determined by the delay of exogenous drives, being simply 25 ms longer. This choice was  
36 driven by parsimony and justified by the fact that all our signals are visual and had similar  
37 properties. Endogenous signals are simply viewed as further-processed versions of exogenous  
38 signals. However, it would be interesting to validate this assumption empirically, by measuring  
39 to what extent the exogenous delay (indexed by dip onset time) correlates with the  
40 endogenous delay (constrained by the shape of the go distribution), across participants or  
41 across conditions. Within the context of individual differences, this would also allow us to test  
42 whether the blocking has indeed the same delay as the endogenous signals driving the saccade  
43 to the target. Similarly, it could be tested whether endogenous timing is indeed the largest  
44 source of variability across people, as is commonly assumed in the countermanding literature.

45

46

## 1 **7. Conclusions**

2 To conclude, the theoretical, simulation and experimental work presented here suggests that  
3 automatic stimulus-driven interference accounts for much of the characteristic behavior in  
4 countermanding tasks, in contrast to the idea that these tasks primarily index higher level  
5 cognitive control. This highlights the importance of stimulus-driven effects in paradigms  
6 generally associated with higher cognition. More generally, we hope to help shift the  
7 traditional separation of automatic and voluntary processes towards a more integrated  
8 understanding of how automatic and voluntary control work together, alongside parallel  
9 endeavors to untangle the mysteriously intelligent control homunculus into the emergent  
10 activity of an army of idiots.

11

## 12 **8. Acknowledgments**

13 The authors acknowledge funding from the School of Psychology at Cardiff University, Alcohol  
14 Research UK (RS 12/01; AEC), the Economic and Social Research Council (ES/K002325/1; AB  
15 and PS). Funding sources had no involvement at any stage of the reported research. We are  
16 grateful to Geoffrey Megardon for help with the analysis and to Craig Hedge and Christopher  
17 D. Chambers for useful comments on the manuscript.

18

## 19 **9. References**

- 20 Akerfelt, A., Colonius, H., & Diederich, A. (2006). Visual-tactile saccadic inhibition. *Exp Brain*  
21 *Res*, 169(4), 554-563. doi: 10.1007/s00221-005-0168-x
- 22 Armstrong, I. T., & Munoz, D. P. (2003). Inhibitory control of eye movements during  
23 oculomotor countermanding in adults with attention-deficit hyperactivity disorder.  
24 *Exp Brain Res*, 152(4), 444-452. doi: 10.1007/s00221-003-1569-3
- 25 Asrress, K. N., & Carpenter, R. H. S. (2001). Saccadic countermanding: A comparison of central  
26 and peripheral stop signals. *Vision Research*, 41(20), 2645-2651. doi: 10.1016/S0042-  
27 6989(01)00107-9
- 28 Band, G. P. H., van der Molen, M. W., & Logan, G. D. (2003). Horse-race model simulations of  
29 the stop-signal procedure. *Acta Psychologica*, 112, 105-142. doi: 10.1016/S0001-  
30 6918(02)00079-3
- 31 Bissett, P. G., & Logan, G. D. (2014). Selective stopping? Maybe not. *J Exp Psychol Gen*, 143(1),  
32 455-472. doi: 10.1037/a0032122
- 33 Bogacz, R., Wagenmakers, E. J., Forstmann, B. U., & Nieuwenhuis, S. (2010). The neural basis of  
34 the speed-accuracy tradeoff. *Trends Neurosci*, 33(1), 10-16. doi:  
35 10.1016/j.tins.2009.09.002
- 36 Bompas, A., Hedge, C., & Sumner, P. (2017). Speeded saccadic and manual visuo-motor  
37 decisions: Distinct processes but same principles. *Cogn Psychol*, 94, 26-52. doi:  
38 10.1016/j.cogpsych.2017.02.002
- 39 Bompas, A., & Sumner, P. (2008). Sensory sluggishness dissociates saccadic, manual, and  
40 perceptual responses: An S-cone study. *Journal of Vision*, 8(8), 1-13.
- 41 Bompas, A., & Sumner, P. (2009). Temporal dynamics of saccadic distraction. *Journal of Vision*,  
42 9(9), 1-14.
- 43 Bompas, A., & Sumner, P. (2011). Saccadic inhibition reveals the timing of automatic and  
44 voluntary signals in the human brain. *Journal of Neuroscience*, 31(35), 12501-12512.  
45 doi: 10.1523/JNEUROSCI.2234-11.2011



- 1 Bompas, A., & Sumner, P. (2015). Saccadic inhibition and the remote distractor effect: One  
2 mechanism or two? *J Vis*, *15*(6), 1-8. doi: 10.1167/15.6.15
- 3 Boucher, L., Palmeri, T. J., Logan, G. D., & Schall, J. D. (2007). Inhibitory control in mind and  
4 brain: An interactive race model of countermanding Saccades. *Psychological Review*,  
5 *114*(2), 376-397. doi: 10.1037/0033-295x.114.2.376
- 6 Boucher, L., Stuphorn, V., Logan, G. D., Schall, J. D., & Palmeri, T. J. (2007). Stopping eye and  
7 hand movements: Are the processes independent? *Perception & Psychophysics*, *69*(5),  
8 785-801.
- 9 Boy, F., Husain, M., & Sumner, P. (2010). Unconscious inhibition separates two forms of  
10 cognitive control. *Proceedings of the National Academy of Sciences of the United*  
11 *States of America*, *107*(24), 11134-11139. doi: 10.1073/Pnas.1001925107
- 12 Brown, S., & Heathcote, A. (2005). A ballistic model of choice response time. *Psychological*  
13 *Review*, *112*(1), 117-128.
- 14 Buonocore, A., & McIntosh, R. D. (2008). Saccadic inhibition underlies the remote distractor  
15 effect. *Experimental Brain Research*, *191*(1), 117-122.
- 16 Buonocore, A., & McIntosh, R. D. (2012). Modulation of saccadic inhibition by distractor size  
17 and location. *Vision Research*, *69*, 32-41. doi: 10.1016/J.Visres.2012.07.010
- 18 Buonocore, A., & McIntosh, R. D. (2013). Attention modulates saccadic inhibition magnitude.  
19 *Quarterly Journal of Experimental Psychology*, *66*(6), 1051-1059. doi:  
20 10.1080/17470218.2013.797001
- 21 Buonocore, A., Purokayastha, S., & McIntosh, R. D. (2017). Saccade Reorienting Is Facilitated by  
22 Pausing the Oculomotor Program. *Journal of Cognitive Neuroscience*. doi:  
23 10.1162/jocn\_a\_01179
- 24 Cabel, D. W. J., Armstrong, I. T., Reingold, E., & Munoz, D. P. (2000). Control of saccade  
25 initiation in a countermanding task using visual and auditory stop signals. *Experimental*  
26 *Brain Research*, *133*(4), 431-441. doi: 10.1007/s002210000440
- 27 Campbell, A. E., Chambers, C. D., Allen, C. P. G., Hedge, C., & Sumner, P. (2017). Impairment of  
28 manual but not saccadic response inhibition following acute alcohol intoxication. *Drug*  
29 *Alcohol Depend*, *181*, 242-254. doi: 10.1016/j.drugalcdep.2017.08.022
- 30 Carpenter, R. H. S., & Williams, M. L. L. (1995). Neural Computation of Log Likelihood in Control  
31 of Saccadic Eye-Movements. *Nature*, *377*(6544), 59-62.
- 32 Colonius, H., & Diederich, A. (2018). Paradox resolved: stop signal race model with negative  
33 dependence. *Psychological Review*, *In Press*.
- 34 Cutsuridis, V., Smyrnis, N., Evdokimds, L., & Perantonis, S. (2007). A neural model of decision-  
35 making by the superior colicullus in an antisaccade task. *Neural Networks*, *20*(6), 690-  
36 704.
- 37 de Jong, R., Coles, M. G. H., Logan, G. D., & Gratton, G. (1990). In search of the point of no  
38 return: the control of response processes. *J Exp Psychol Hum Percept Perform*, *16*(1),  
39 164-182. doi: 10.1037/0096-1523.16.1.164
- 40 Edelman, J. A., & Xu, K. Z. (2009). Inhibition of Voluntary Saccadic Eye Movement Commands  
41 by Abrupt Visual Onsets. *Journal of Neurophysiology*, *101*(3), 1222-1234. doi:  
42 10.1152/Jn.90708.2008
- 43 Elchlepp, H., Lavric, A., Chambers, C. D., & Verbruggen, F. (2016). Proactive inhibitory control:  
44 A general biasing account. *Cogn Psychol*, *86*, 27-61. doi:  
45 10.1016/j.cogpsych.2016.01.004
- 46 Forstmann, B. U., Anwander, A., Schafer, A., Neumann, J., Brown, S., Wagenmakers, E. J., . . .  
47 Turner, R. (2010). Cortico-striatal connections predict control over speed and accuracy  
48 in perceptual decision making. *Proc Natl Acad Sci U S A*, *107*(36), 15916-15920. doi:  
49 10.1073/pnas.1004932107

- 1 Gulberti, A., Arndt, P. a., & Colonius, H. (2014). Stopping eyes and hands: evidence for non-  
2 independence of stop and go processes and for a separation of central and peripheral  
3 inhibition. *Frontiers in Human Neuroscience*, 8(February), article 61. doi:  
4 10.3389/fnhum.2014.00061
- 5 Hanes, D. P., & Carpenter, R. H. S. (1999). Countermanding saccades in humans. *Vision*  
6 *Research*, 39(16), 2777-2791. doi: 10.1016/S0042-6989(99)00011-5
- 7 Hanes, D. P., Patterson, W. F., & Schall, J. D. (1998). Role of frontal eye fields in  
8 countermanding saccades: Visual, movement, and fixation activity. *Journal of*  
9 *Neurophysiology*, 79(2), 817-834.
- 10 Hanes, D. P., & Schall, J. D. (1995). Countermanding Saccades in Macaque. *Visual Neuroscience*,  
11 12(5), 929-937.
- 12 Harrison, J. J., Freeman, T. C. A., & Sumner, P. (2014). Saccade-like behavior in the fast-phases  
13 of optokinetic nystagmus: An illustration of the emergence of volitional actions from  
14 automatic reflexes. *Journal of Experimental Psychology: General*. doi:  
15 10.1037/a0037021
- 16 Heitz, R. P., & Schall, J. D. (2012). Neural mechanisms of speed-accuracy tradeoff. *Neuron*,  
17 76(3), 616-628. doi: 10.1016/j.neuron.2012.08.030
- 18 Ito, S., Stuphorn, V., Brown, J. W., & Schall, J. D. (2003). Performance monitoring by the  
19 anterior cingulate cortex during saccade countermanding. *Science*, 302(5642), 120-  
20 122.
- 21 Kopecz, K. (1995). Saccadic reaction times in gap/overlap paradigms: a model based on  
22 integration of intentional and visual information on neural, dynamic fields. *Vision Res*,  
23 35(20), 2911-2925.
- 24 Kunde, W., Kiesel, A., & Hoffmann, J. (2003). Conscious control over the content of  
25 unconscious cognition. *Cognition*, 88(2), 223-242.
- 26 Lo, C. C., Boucher, L., Pare, M., Schall, J. D., & Wang, X. J. (2009). Proactive Inhibitory Control  
27 and Attractor Dynamics in Countermanding Action: A Spiking Neural Circuit Model.  
28 *Journal of Neuroscience*, 29(28), 9059-9071. doi: 10.1523/Jneurosci.6164-08.2009
- 29 Logan, G. D., & Burkell, J. (1986). Dependence and Independence in Responding to Double  
30 Stimulation: A Comparison of Stop, Change, and Dual-Task Paradigms. *Journal of*  
31 *Experimental Psychology: Human Perception and Performance*, 12(4), 549-563.
- 32 Logan, G. D., & Cowan, W. B. (1984). On the Ability to Inhibit Thought and Action - a Theory of  
33 an Act of Control. *Psychological Review*, 91(3), 295-327.
- 34 Logan, G. D., Yamaguchi, M., Schall, J. D., & Palmeri, T. J. (2015). Inhibitory control in mind and  
35 brain 2.0: blocked-input models of saccadic countermanding. *Psychol Rev*, 122(2), 115-  
36 147. doi: 10.1037/a0038893
- 37 Matzke, D., Love, J., & Heathcote, A. (2017). A Bayesian approach for estimating the  
38 probability of trigger failures in the stop-signal paradigm. *Behav Res Methods*, 49(1),  
39 267-281. doi: 10.3758/s13428-015-0695-8
- 40 McBride, J., Boy, F., Husain, M., & Sumner, P. (2012). Automatic motor activation in the  
41 executive control of action. *Frontiers in Human Neuroscience*, 6(April), Article 82. doi:  
42 10.3389/fnhum.2012.00082
- 43 McIntosh, R. D., & Buonocore, A. (2014). Saccadic inhibition can cause the remote distractor  
44 effect, but the remote distractor effect may not be a useful concept. *J Vis*, 14(5), 15.  
45 doi: 10.1167/14.5.15
- 46 Meeter, M., Van der Stigchel, S., & Theeuwes, J. (2010). A competitive integration model of  
47 exogenous and endogenous eye movements. *Biological Cybernetics*, 102(4), 271-291.

- 1 Monsell, S., & Driver, J. (2000). Banishing the control homunculus. In S. Monsell & J. Driver  
2 (Eds.), *Control of cognitive processes: Attention and performance XVIII* (pp. 3-32).  
3 Cambridge, MA: MIT Press.
- 4 Morein-Zamir, S., & Kingstone, A. (2006). Fixation offset and stop signal intensity effects on  
5 saccadic countermanding: a crossmodal investigation. *Experimental Brain Research*,  
6 *175*(3), 453-462. doi: 10.1007/s00221-006-0564-x
- 7 Munoz, D. P., & Wurtz, R. H. (1993a). Fixation cells in monkey superior colliculus. I.  
8 Characteristics of cell discharge. *J Neurophysiol*, *70*(2), 559-575.
- 9 Munoz, D. P., & Wurtz, R. H. (1993b). Fixation cells in monkey superior colliculus. II. Reversible  
10 activation and deactivation. *J Neurophysiol*, *70*(2), 576-589.
- 11 Noorani, I., & Carpenter, R. H. (2017). Not moving: the fundamental but neglected motor  
12 function. *Philos Trans R Soc Lond B Biol Sci*, *372*(1718). doi: 10.1098/rstb.2016.0190
- 13 O'Connor, D. H., Fukui, M. M., Pinsk, M. A., & Kastner, S. (2002). Attention modulates  
14 responses in the human lateral geniculate nucleus. *Nat Neurosci*, *5*(11), 1203-1209.  
15 doi: 10.1038/nn957
- 16 Ozyurt, J., Colonius, H., & Arndt, P. A. (2003). Countermanding saccades: evidence against  
17 independent processing of go and stop signals. *Percept Psychophys*, *65*(3), 420-428.
- 18 Paré, M., & Hanes, D. P. (2003). Controlled Movement Processing: Superior Colliculus Activity  
19 Associated with Countermanded Saccades. *The Journal of neuroscience : the official*  
20 *journal of the Society for Neuroscience*, *23*(16), 6480-6489.
- 21 Pouget, P., Logan, G. D., Palmeri, T. J., Boucher, L., Pare, M., & Schall, J. D. (2011). Neural Basis  
22 of Adaptive Response Time Adjustment during Saccade Countermanding. *Journal of*  
23 *Neuroscience*. doi: 10.1523/JNEUROSCI.1868-11.2011
- 24 Purcell, B. A., Heitz, R. P., Cohen, J. Y., Schall, J. D., Logan, G. D., & Palmeri, T. J. (2010). Neurally  
25 Constrained Modeling of Perceptual Decision Making. *Psychological Review*, *117*(4),  
26 1113-1143. doi: Doi 10.1037/A0020311
- 27 Ratcliff, R., & McKoon, G. (2008). The diffusion decision model: theory and data for two-choice  
28 decision tasks. *Neural Comput*, *20*(4), 873-922. doi: 10.1162/neco.2008.12-06-420
- 29 Ray, S., Pouget, P., & Schall, J. D. (2009). Functional Distinction Between Visuomovement and  
30 Movement Neurons in Macaque Frontal Eye Field During Saccade Countermanding.  
31 *Journal of Neurophysiology*, *102*(6), 3091-3100. doi: 10.1152/Jn.00270.2009
- 32 Reingold, E. M., & Stampe, D. M. (2002). Saccadic inhibition in voluntary and reflexive  
33 saccades. *J Cogn Neurosci*, *14*(3), 371-388.
- 34 Reingold, E. M., & Stampe, D. M. (2004). Saccadic inhibition in reading. *Journal of Experimental*  
35 *Psychology-Human Perception and Performance*, *30*(1), 194-211. doi: 10.1037/0096-  
36 1523.30.1.194
- 37 Reppert, T. R., Servant, M., Heitz, R. P., & Schall, J. D. (2018). Neural mechanisms of speed-  
38 accuracy tradeoff of visual search: saccade vigor, the origin of targeting errors, and  
39 comparison of the superior colliculus and frontal eye field. *J Neurophysiol*, *120*(1), 372-  
40 384. doi: 10.1152/jn.00887.2017
- 41 Rolfs, M., Kliegl, R., & Engbert, R. (2008). Toward a model of microsaccade generation: the  
42 case of microsaccadic inhibition. *J Vis*, *8*(11), 5 1-23. doi: 10.1167/8.11.5
- 43 Schall, J. D., Palmeri, T. J., & Logan, G. D. (2017). Models of inhibitory control. *Philos Trans R*  
44 *Soc Lond B Biol Sci*, *372*(1718). doi: 10.1098/rstb.2016.0193
- 45 Schmidt, R., & Berke, J. D. (2017). A Pause-then-Cancel model of stopping: evidence from basal  
46 ganglia neurophysiology. *Philos Trans R Soc Lond B Biol Sci*, *372*(1718). doi:  
47 10.1098/rstb.2016.0202

- 1 Shadlen, M. N., Britten, K. H., Newsome, W. T., & Movshon, J. A. (1996). A computational  
2 analysis of the relationship between neuronal and behavioral responses to visual  
3 motion. *Journal of Neuroscience*, *16*(4), 1486-1510.
- 4 Skippen, P., Matzke, D., Heathcote, A., Fulham, W. R., Michie, P., & Karayanidis, F. (2018).  
5 Reliability of triggering inhibitory process is a better predictor of impulsivity than SSRT.  
6 *PsyArXiv*. doi: <https://doi.org/10.31234/osf.io/vg5rd>
- 7 Stevenson, S. A., Elsley, J. K., & Corneil, B. D. (2009). A "Gap Effect" on Stop Signal Reaction  
8 Times in a Human Saccadic Countermanding Task. *Journal of Neurophysiology*, *101*(2),  
9 580-590. doi: 10.1152/jn.90891.2008
- 10 Stuphorn, V., Taylor, T. L., & Schall, J. D. (2000). Performance monitoring by the supplementary  
11 eye field. *Nature*, *408*(6814), 857-860.
- 12 Sumner, P., & Husain, M. (2008). At the edge of consciousness: automatic motor activation  
13 and voluntary control. *The Neuroscientist*, *14*(5), 474-486.
- 14 Trappenberg, T. P., Dorris, M. C., Munoz, D. P., & Klein, R. M. (2001). A model of saccade  
15 initiation based on the competitive integration of exogenous and endogenous signals  
16 in the superior colliculus. *Journal of Cognitive Neuroscience*, *13*(2), 256-271.
- 17 Usher, M., & McClelland, J. L. (2001). The time course of perceptual choice: The leaky,  
18 competing accumulator model. *Psychological Review*, *108*(3), 550-592.
- 19 van Gaal, S., Lamme, V. A., Fahrenfort, J. J., & Ridderinkhof, K. R. (2011). Dissociable brain  
20 mechanisms underlying the conscious and unconscious control of behavior. *J Cogn  
21 Neurosci*, *23*(1), 91-105. doi: 10.1162/jocn.2010.21431
- 22 Verbruggen, F., Best, M., Bowditch, W. A., Stevens, T., & McLaren, I. P. (2014). The inhibitory  
23 control reflex. *Neuropsychologia*, *65*, 263-278. doi:  
24 10.1016/j.neuropsychologia.2014.08.014
- 25 Verbruggen, F., Chambers, C. D., & Logan, G. D. (2013). Fictitious inhibitory differences: how  
26 skewness and slowing distort the estimation of stopping latencies. *Psychol Sci*, *24*(3),  
27 352-362. doi: 10.1177/0956797612457390
- 28 Verbruggen, F., & Logan, G. D. (2008). Automatic and Controlled Response Inhibition:  
29 Associative Learning in the Go/No-Go and Stop-Signal Paradigms. *Journal of  
30 Experimental Psychology-General*, *137*(4), 649-672.
- 31 Verbruggen, F., & Logan, G. D. (2009). Proactive Adjustments of Response Strategies in the  
32 Stop-Signal Paradigm. *Journal of Experimental Psychology-Human Perception and  
33 Performance*, *35*(3), 835-854.
- 34 Verbruggen, F., McLaren, I. P., & Chambers, C. D. (2014). Banishing the Control Homunculi in  
35 Studies of Action Control and Behavior Change. *Perspect Psychol Sci*, *9*(5), 497-524.  
36 doi: 10.1177/1745691614526414
- 37 Verbruggen, F., Stevens, T., & Chambers, C. D. (2014). Proactive and reactive stopping when  
38 distracted: an attentional account. *J Exp Psychol Hum Percept Perform*, *40*(4), 1295-  
39 1300. doi: 10.1037/a0036542
- 40 Walker, R., Mannan, S., Maurer, D., Pambakian, A. L. M., & Kennard, C. (2000). The oculomotor  
41 distractor effect in normal and hemianopic vision. *Proc. R. Soc. Lond. B*, *267*, 431-438.
- 42 Wessel, J. R., & Aron, A. R. (2017). On the Globality of Motor Suppression: Unexpected Events  
43 and Their Influence on Behavior and Cognition. *Neuron*, *93*(2), 259-280. doi:  
44 10.1016/j.neuron.2016.12.013
- 45 White, B. J., & Munoz, D. P. (2011). Separate Visual Signals for Saccade Initiation during Target  
46 Selection in the Primate Superior Colliculus. *Journal of Neuroscience*, *31*(5), 1570-1578.
- 47 Wiecki, T. V., & Frank, M. J. (2013). A computational model of inhibitory control in frontal  
48 cortex and basal ganglia. *Psychol Rev*, *120*(2), 329-355. doi: 10.1037/a0031542

1

2 **Appendix**

3

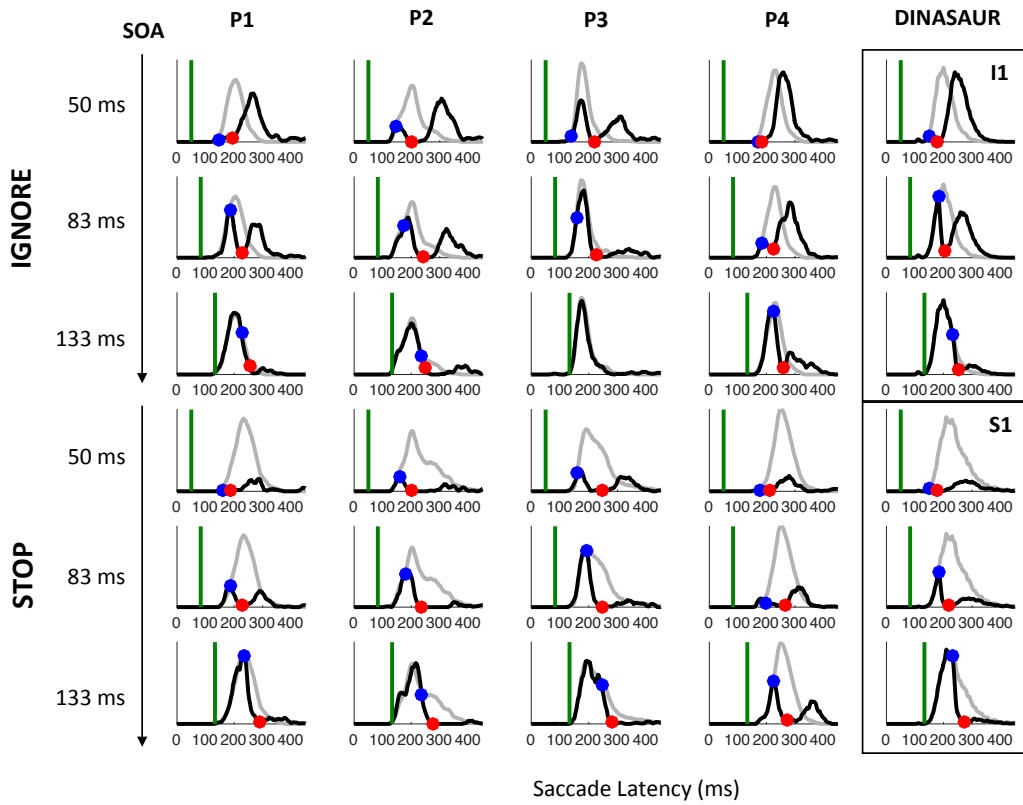

4

5 **Figure S1.** Latency distributions for each participant (columns) and SOA (rows) in the IGNORE  
6 and STOP contexts of Experiment 1, along with simulations from DINASAUR (using parameter  
7 sets I1 and S1 on Table 5). Green lines indicate the signal onset. Grey lines indicate distributions  
8 in which no signal was presented. Black lines indicate distributions of trials in which a signal  
9 occurred. Blue dots indicate the dip onset (i.e. where the distributions diverge, not necessarily  
10 where one takes a down-turn); red dots show dip maximum.

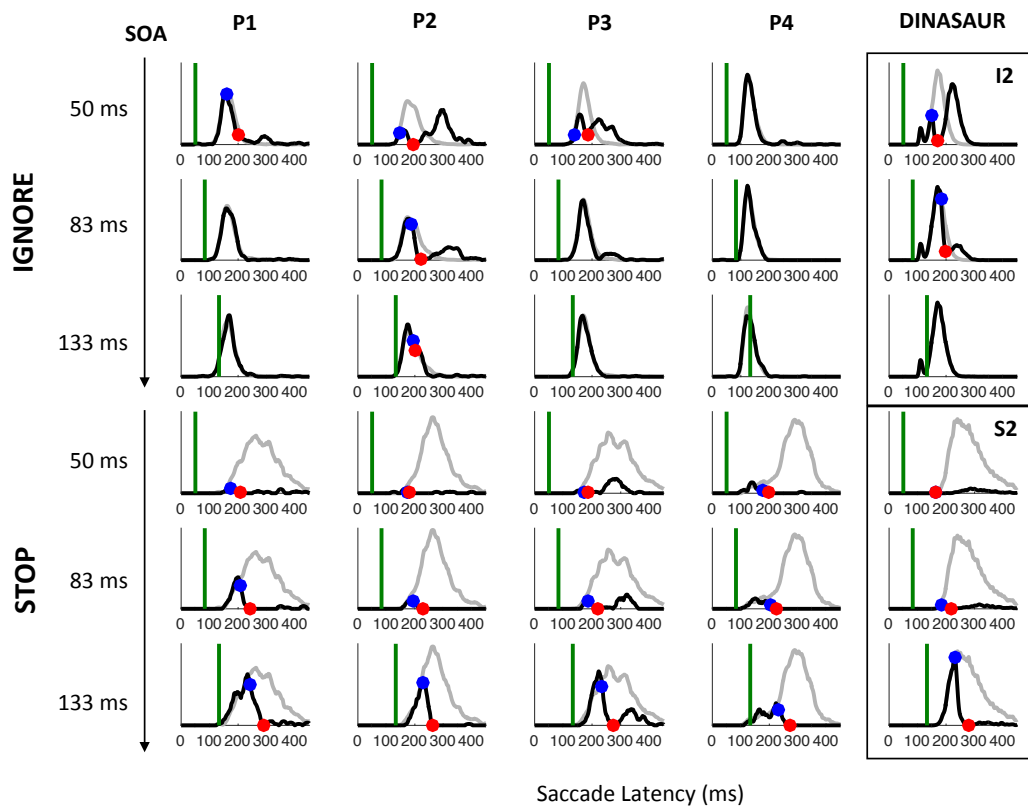

1

2 **Figure S2.** Latency distributions for Experiment 2. Same conventions as Figure S1 above. As  
 3 expected, strategic adjustments across conditions were particularly large in Experiment 2  
 4 (where the two contexts were kept fully separated) and meant the visual signal often arrived  
 5 too late to have much effect, especially for the fastest participants (P1 and P4). Nevertheless,  
 6 when dips were observed in both contexts, Experiment 2 confirmed the results from Experiment  
 7 1.

8

9

10

11

12

13

14

15

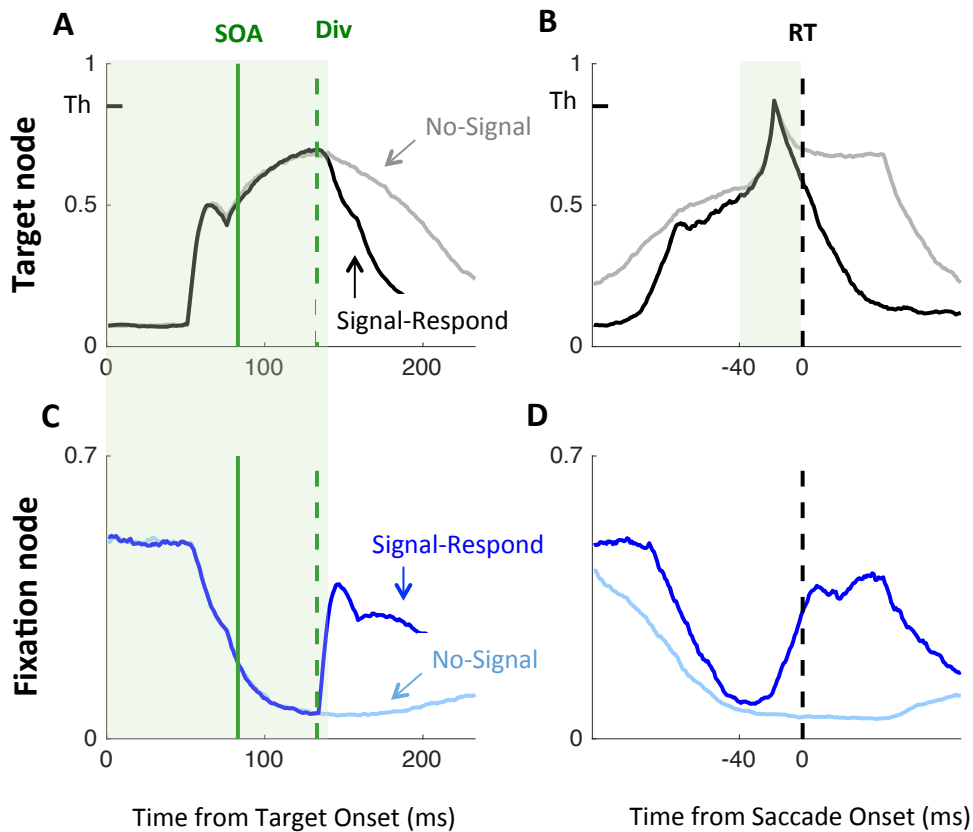

1  
2  
3  
4  
5  
6  
7  
8  
9  
10  
11  
12  
13

**Figure S3.** DINASAUR accounts for patterns in neural activity previously taken to imply independence of Go and Stop processes. **A&C.** Mean simulated activity during unsuccessful stop trials (signal-Respond) and latency matched No-Signal trials at SOA 83 ms, using the same convention as Figure 6 and matching Fig. 4 A&C in Boucher et al. (2007). **B.** Same data as in A but locked on saccade onset, following Fig. 3F in Paré & Hanes (2003). **D.** Same data as in C but locked on saccade onset (not shown in Paré & Hanes (2003), shown here for completion). Green shades indicate those time windows chosen in these two previous articles to illustrate the equality of neural activity between Signal-Respond and fast No-Signal trials. Clear differences are apparent outside these time windows.
